# Task-Based Core-Periphery Organization of Human Brain Dynamics

Danielle S. Bassett<sup>1,2\*</sup>, Nicholas F. Wymbs<sup>3</sup>, M. Puck Rombach<sup>4,5</sup>, Mason A. Porter<sup>4,5</sup>, Peter J. Mucha<sup>6,7</sup>, Scott T. Grafton<sup>3</sup>

**1** Department of Physics, University of California, Santa Barbara, Santa Barbara, California, United States of America, **2** Sage Center for the Study of the Mind, University of California, Santa Barbara, Santa Barbara, California, United States of America, **3** Department of Psychological and Brain Sciences and UCSB Brain Imaging Center, University of California, Santa Barbara, Santa Barbara, California, United States of America, **4** Oxford Centre for Industrial and Applied Mathematics, Mathematical Institute, University of Oxford, Oxford, United Kingdom, **5** CABDyN Complexity Centre, University of Oxford, Oxford, United Kingdom, **6** Carolina Center for Interdisciplinary Applied Mathematics, Department of Mathematics, University of North Carolina, Chapel Hill, North Carolina, United States of America, **7** Institute for Advanced Materials, Nanoscience & Technology, University of North Carolina, Chapel Hill, North Carolina, United States of America

## Abstract

As a person learns a new skill, distinct synapses, brain regions, and circuits are engaged and change over time. In this paper, we develop methods to examine patterns of correlated activity across a large set of brain regions. Our goal is to identify properties that enable robust learning of a motor skill. We measure brain activity during motor sequencing and characterize network properties based on coherent activity between brain regions. Using recently developed algorithms to detect time-evolving communities, we find that the complex reconfiguration patterns of the brain's putative functional modules that control learning can be described parsimoniously by the combined presence of a relatively stiff temporal *core* that is composed primarily of sensorimotor and visual regions whose connectivity changes little in time and a flexible temporal *periphery* that is composed primarily of multimodal association regions whose connectivity changes frequently. The separation between temporal core and periphery changes over the course of training and, importantly, is a good predictor of individual differences in learning success. The core of dynamically stiff regions exhibits dense connectivity, which is consistent with notions of core-periphery organization established previously in social networks. Our results demonstrate that core-periphery organization provides an insightful way to understand how putative functional modules are linked. This, in turn, enables the prediction of fundamental human capacities, including the production of complex goal-directed behavior.

**Citation:** Bassett DS, Wymbs NF, Rombach MP, Porter MA, Mucha PJ, et al. (2013) Task-Based Core-Periphery Organization of Human Brain Dynamics. *PLoS Comput Biol* 9(9): e1003171. doi:10.1371/journal.pcbi.1003171

**Editor:** Olaf Sporns, Indiana University, United States of America

**Received:** February 19, 2013; **Accepted:** June 21, 2013; **Published:** September 26, 2013

**Copyright:** © 2013 Bassett et al. This is an open-access article distributed under the terms of the Creative Commons Attribution License, which permits unrestricted use, distribution, and reproduction in any medium, provided the original author and source are credited.

**Funding:** DSB was supported by the Sage Center for the Study of the Mind, the Errett Fisher Foundation, the Templeton Foundation, the David and Lucile Packard Foundation, the Public Health Service Grant NS44393, and the Institute for Collaborative Biotechnologies through Contract W911NF-09-D-0001 from the US Army Research Office. MAP and MPR acknowledge a research award (#220020177) from the James S. McDonnell Foundation. MAP was also funded by FET Proactive Project PLEXMATH (FP7-ICT-2011-8; Grant #317614) from the European Commission as well as by the EPSRC (EP/J001759/1). PJM acknowledges support from Award Number R21GM099493 from the National Institute of General Medical Sciences. The content is solely the responsibility of the authors and does not necessarily represent the official views of any of the funding agencies. The funders had no role in study design, data collection and analysis, decision to publish, or preparation of the manuscript.

**Competing Interests:** The authors have declared that no competing interests exist.

\* E-mail: dbassett@physics.ucsb.edu

## Introduction

Cohesive structures have long been thought to play an important role in information processing in the human brain [1]. At the small scale of individual neurons, temporally coherent activity supports information transfer between cells [2]. At a much larger scale, simultaneously active cortical areas form functional systems that enable behavior [1]. However, the question of precisely what type of cohesive organization is present between the constituents of brain systems—especially at larger scales—has been steeped in controversy [3,4]. Although low-frequency interactions between pairs of brain areas are easy to measure, the simultaneous characterization of dynamic interactions across the entire human brain remained challenging until recent applications of network theory to neuroimaging data [5]. These efforts have led to enormous insights, including the establishment of relationships between stationary functional brain network

configuration and intelligence [6] as well as relationships between altered brain network organization and disease [7]. In this paper, we extend this approach to a non-stationary situation: the change of network activity across the brain as a new skill is acquired.

Acquisition of new motor skills alters brain activity across spatial scales. At the level of individual neurons, this induces changes in firing behavior in the motor cortex [8]. At the level of large-scale areas, this induces changes in the interactions between primary motor cortex and premotor areas, and these changes can influence the amount of learning [9]. Previous studies have demonstrated that pairwise interactions between some of these premotor regions, as measured by the magnitude of coherence between low-frequency blood-oxygen-level-dependent (BOLD) signals, strengthen with practice [10]. Furthermore, complex contributions by non-motor systems such as prefrontal cortex are involved in the strategic control of behavior during learning [11]. These findings reveal some of the changes in local circuits that occur with

## Author Summary

When someone learns a new skill, his/her brain dynamically alters individual synapses, regional activity, and larger-scale circuits. In this paper, we capture some of these dynamics by measuring and characterizing patterns of coherent brain activity during the learning of a motor skill. We extract time-evolving communities from these patterns and find that a temporal core that is composed primarily of primary sensorimotor and visual regions reconfigures little over time, whereas a periphery that is composed primarily of multimodal association regions reconfigures frequently. The core consists of densely connected nodes, and the periphery consists of sparsely connected nodes. Individual participants with a larger separation between core and periphery learn better in subsequent training sessions than individuals with a smaller separation. Conceptually, core-periphery organization provides a framework in which to understand how putative functional modules are linked. This, in turn, enables the prediction of fundamental human capacities, including the production of complex goal-directed behavior.

learning. However, there remains no global assessment of changes in brain networks as a result of learning. In this paper, we seek to find cohesive structures in global brain networks that capture dynamics that are particularly relevant for characterizing skill learning that takes place over the relatively long time scales of minutes to hours of practice.

To address these issues, we extract a set of functional networks from task-based functional Magnetic Resonance Imaging (fMRI) time series that describe functional connectivity between brain regions. We probe the dynamics of these putative interactions by subdividing time series into discrete time intervals (of approximately two minutes in duration; see Fig. 1A) during the acquisition of a simple motor skill. Subjects learned a set of 10-element motor sequences similar to piano arpeggios by practicing for at least 30 days during a 6-week period. The depth of training was manipulated so that 2 sequences were extensively practiced (EXT), 2 sequences were moderately practiced (MOD), and 2 sequences were minimally practiced (MIN) on each day. In addition, subjects performed blocks of all of the sequences during fMRI scanning on approximately days 1, 14, 28, and 42 of practice. Using the fMRI time series, we extract functional networks representing the coherence between 112 cortical and subcortical areas for each sequence block.

To characterize brain dynamics, we represent sets of functional networks as multilayer brain networks and we identify putative functional modules—i.e., groups of brain regions that exhibit similar BOLD time courses—in each 2–3 minute time window. Such cohesive groups of nodes are called “communities” in the network-science literature [12,13], and they suggest that different sets of brain regions might be related to one another functionally either through direct anatomical connections or through indirect activation by an external stimulus. A community of brain regions might code for a different function (e.g., visual processing, motor performance, or cognitive control), or it might engage in the same function using a distinct processing stream. Characterizing changes in community structure thus makes it possible to map meaningful dynamic patterns of functional connectivity that relate to changes in cognitive function (e.g., learning).

We employ computational tools for dynamic community detection [14,15] for multilayer representations of temporal

networks [16] and summarize our findings using diagnostics that quantify three properties of community structure. (See Materials and Methods for their definitions and Ref. [17] for evidence supporting the utility of these diagnostics in capturing changes in brain dynamics over 3 days of learning.) To measure the strength of functional modularization in the brain and quantify the extent of compartmentalization of putative functional modules, we maximize a quality function called *multilayer modularity*  $Q$  to obtain a partition of the brain into communities. (The associated maximum value of  $Q$  is known as the *maximum modularity*.) A high value of  $Q$  indicates that the pattern of functional connectivity in the brain can be clustered sensibly into distinct communities of brain regions that exhibit similar time courses. We also compute the number  $n$  of communities (i.e., putative functional modules) in partitions of the multilayer networks. A large value of  $n$  indicates that there are a large number of distinct temporal profiles in BOLD activations in the brain. To measure the temporal variability of community structure, we compute the *flexibility*  $f_i$  of each region  $i$ , as this quantifies the frequency that a brain region  $i$  changes its allegiances to network communities over time. A high value of flexibility indicates that a region often changes community affiliation.

Our results demonstrate that the temporal evolution of community structure is modulated strongly by the depth of training (as reflected in the total number of practiced trials). We also show that the temporal variability of module allegiance varies across brain regions. Sensorimotor and visual cortices form the bulk of a relatively stiff temporal core in which module affiliations change little over a scanning session, whereas multimodal association areas form the bulk of a relatively flexible temporal periphery in which module affiliations change frequently. The separation between the temporal core and temporal periphery predicts individual differences in extended learning. We combine these methods for identifying a temporal core and periphery with a notion of core-periphery organization that originated in the social sciences [18] to show that the organizational structure of functional networks in 2–3 minute time windows correlates with the organizational structure of the brain’s temporal evolution: densely connected regions in individual time windows tend to exhibit little change in module allegiance over time, whereas weakly connected regions tend to exhibit significant changes. Taken together, our results suggest that core-periphery organization is a critical property that is as important as modularity for understanding and predicting cognition and behavior (see Fig. 1B).

## Results

### Dynamic Community Structure Changes with Learning

Community structure changes with the number of trials practiced, independent of when the practice occurred in the 6 weeks. In Fig. 2, we show multilayer modularity ( $Q$ , a measure of the quality of a partition into communities), the number of communities, and mean flexibility ( $F = \frac{1}{N} \sum_{i=1}^N f_i$ , a measure of the temporal variability in module allegiance) as a function of the number of training trials completed after a scanning session. See Materials and Methods for the definitions and Table 1 for the relationship between the number of trials practiced and training duration and intensity. After an initial increase from 50 to 200 trials practiced, multilayer modularity decreases with an increase in the number of trials practiced, suggesting that community structure in functional brain networks becomes less pronounced with learning. Both the number of communities and the flexibility of community structure increase with the number of trials

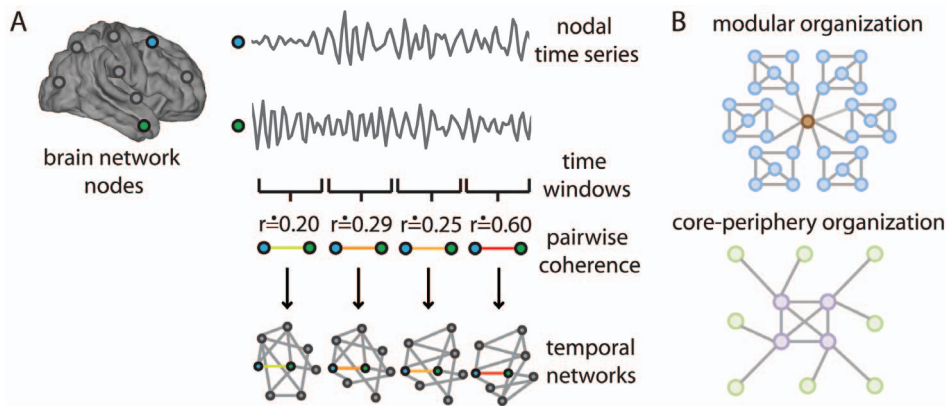

**Figure 1. Network organization of human brain dynamics.** (A) Temporal Networks of the Human Brain. We parcellate the brain into anatomical regions that can be represented as nodes in a network, and we use the coherence between functional Magnetic Resonance Imaging (fMRI) time series of each pair of nodes over a time window to determine the weight of the network edge connecting those nodes. We determine these weights separately using approximately 10 non-overlapping time windows of 2–3 min duration and thereby construct temporal networks that represent the dynamical functional connectivity in the brain. (B) Cohesive Mesoscale Structures. (top) An example of a network with a modular organization in which high-degree nodes (brown) are often found in the center of modules or bridging distinct modules that are composed mostly of low-degree nodes (blue). (bottom) A network with a core-periphery organization in which nodes in the core (purple) are more densely connected with one another than nodes in the periphery are with one another (green).  
doi:10.1371/journal.pcbi.1003171.g001

practiced, which is consistent with an increased specificity of functional connectivity patterns with extended learning.

### Temporal Core-Periphery Organization

**Regional variation in flexibility.** The mean flexibility over participants varied over brain regions. It ranged from approximately 0.04 to approximately 0.14, which implies that brain regions changed their modular affiliation between 4% and 14% of trial blocks on average (see Fig. 3A). The distribution of flexibility across brain regions is decidedly non-Gaussian: the majority of brain regions have relatively high flexibilities, but there is a left-heavy tail of regions (including a small peak) with low values of flexibility. We characterized the distribution of flexibility over brain regions by calculating the third (skewness) and fourth (kurtosis) central moments. The skewness was  $0.50 \pm 0.26$ , and the kurtosis was  $3.04 \pm 0.57$ . To interpret these findings, we note that a distribution's skewness is a measure of its asymmetry, and the

positive values that we observe indicate that the distributions from all participants are skewed to the right. The kurtosis of a distribution is a combined measure of its peakedness [19] and its bimodality [20], and it is sometimes construed as a measure of the extent that a distribution is prone to outliers. The kurtosis values that we observe vary between 2.5 and 5, which includes the value of 3 that occurs for a Gaussian distribution.

**Defining the temporal core and temporal periphery.** To determine the significance of a brain region's variation in flexibility, we compared the flexibility of brain regions in the empirical multilayer network to that expected in a nodal null model. We can define a temporal core, bulk, and periphery (see Fig. 3). The core is the set of regions whose flexibility is significantly less than expected in the null model; the periphery is the set of regions whose flexibility is significantly greater than expected in the null model; and the bulk consists of all remaining regions. As discussed in the Text S1, the delineation of the brain

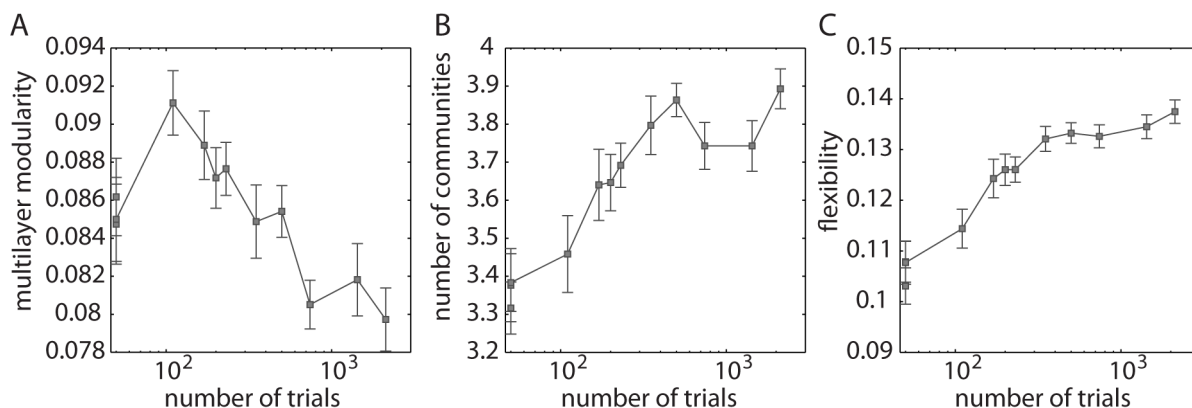

**Figure 2. Dynamic network diagnostics change with learning.** (A) Multilayer modularity, (B) number of communities, and (C) mean flexibility calculated as a function of the number of trials completed after a scanning session (see Table 1 for the relationship between the number of trials practiced and training duration and intensity). We average the values for each diagnostic over the 100 multilayer modularity optimizations, and we average flexibility over the 112 brain regions (in addition to averaging over the 100 optimizations per subject). Error bars indicate the standard error of the mean over participants.  
doi:10.1371/journal.pcbi.1003171.g002

**Table 1.** Relationship between training duration, intensity, and depth.

|               | Session 1 | Session 2 | Session 3 | Session 4 |
|---------------|-----------|-----------|-----------|-----------|
| MIN Sequences | 50        | 110       | 170       | 230       |
| MOD Sequences | 50        | 200       | 350       | 500       |
| EXT Sequences | 50        | 740       | 1430      | 2120      |

We report the number of trials (i.e., “depth”) of each sequence type (i.e., “intensity”) completed after each scanning session (i.e., “duration”) averaged over the 20 participants.

doi:10.1371/journal.pcbi.1003171.t001

into these three groups is robust both to the intensity of training (MIN, MOD, or EXT) and to the duration of training (sessions 1–4). Furthermore, the temporal core, bulk, and periphery tend to form their own communities, although the relationship between core-periphery organization and modular organization appears to be altered by learning (see the Text S1).

We show the anatomical locations of the temporal core, temporal bulk, and temporal periphery in Fig. 3. The relatively stiff core is composed of 19 regions located predominantly in primary sensorimotor areas in both left and right hemispheres. Most of the motor-related regions in the core were left-lateralized, which is consistent with the participants’ use of their right hand to perform the motor sequence. The more flexible periphery is composed of 25 regions located predominantly in multimodal areas—including inferior parietal, intraparietal sulcus, temporal parietal junction, inferotemporal, fusiform gyrus, and visual association areas. The bulk contains the remaining 68 cortical and subcortical regions—including large swaths of frontal, temporal, and parietal cortices. See Table S3 for a complete list of the affiliation of each brain region to the temporal core, bulk, and periphery. The separation of a temporally stiff core of predominantly unimodal regions that process information from single sensory modality (e.g., vision, audition, etc.) and a flexible periphery of predominantly multimodal cortices that process information from multiple modalities is consistent with existing understanding of the association of multimodal cortex with the binding of different types of information and the performance of a broad range of cognitive functions [21].

**Temporal core-periphery organization and learning.** One can interpret the anatomical location of the temporally stiff core that consists primarily of unimodal regions and a flexible periphery that consists primarily of multimodal cortices in the context of the known roles of these cortices in similar tasks. The ability to retrieve and rapidly execute complex motor sequences requires extensive practice. These well-learned sequences are known to be generated by “core” areas [8,22–24]. However, when first learning a sequence, people can use a variety of cognitive strategies that are supported by other brain systems (some of which are located in the periphery to augment performance) [25,26]. In some cases, these strategies are detrimental to skill retention [27]. Consequently, we hypothesized that individuals whose core and periphery are distinct—indicating a strong separability of visuomotor and cognitive regions—would learn better than those whose core and periphery were less distinguishable from one another.

To test this hypothesis, we calculated the Spearman rank coefficient  $\rho$  between the skewness and kurtosis of the flexibility distribution estimated from the fMRI data of the first scanning session and the learning parameter  $\kappa$  estimated over the next 10 days of home training (see Materials and Methods). The kurtosis

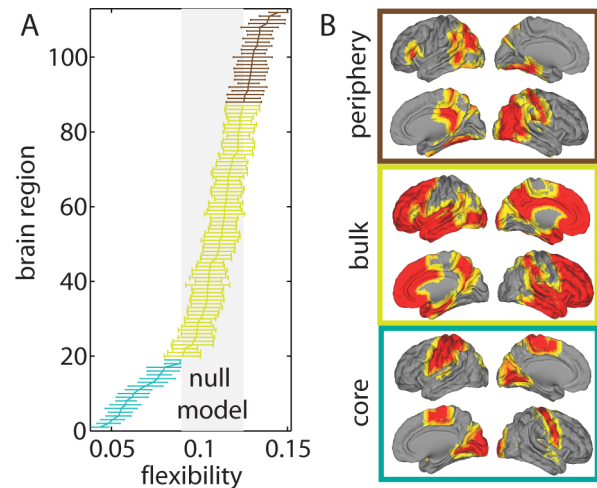

**Figure 3. Temporal core-periphery organization of the brain.** determined using fMRI signals during the performance of a simple motor learning task. (A) The core (cyan), bulk (gold), and periphery (maroon) nodes consist, respectively, of brain regions whose mean flexibility over individuals is less than, equal to, and greater than that expected in a null model (gray shaded region). We measure flexibility based on the allegiance of nodes to putative functional modules. Error bars indicate the standard error of the mean over individuals. (B) The anatomical distribution of regions in the core, bulk, and periphery appears to be spatially contiguous. The core primarily contains sensorimotor and visual processing areas, the periphery primarily contains multimodal association areas, and the bulk contains the remainder of the brain (and is therefore composed predominantly of frontal and temporal cortex).

doi:10.1371/journal.pcbi.1003171.g003

(in essence) measures the separation between the temporal core and the temporal periphery and is negatively correlated with  $\kappa$  (the correlation is  $\rho \doteq -0.498$ , and the p-value is  $p \doteq 0.027$ ), indicating that individuals with a narrower separation between temporal core and temporal periphery learn better in the subsequent 10 home training sessions than individuals with a greater separation between temporal core and temporal periphery. Skewness (in essence) measures the presence of—rather than the separation between—the temporal core and the temporal periphery and is also negatively correlated with learning ( $\rho \doteq -0.480$  and  $p \doteq 0.034$ ), indicating that individuals whose flexibility was more skewed over brain regions learned better than those whose flexibility over brain regions was less skewed. This finding implies that individuals with “stronger” temporal core-periphery structure (i.e., larger values of skewness) learn better than those with “weaker” temporal core-periphery structure (i.e., smaller values of skewness).

Importantly, the temporal separation of the data from the scanning session (which we used to estimate brain flexibility) and the home training (which we used to estimate learning) ensures that these correlations are predictive. Together, these results indicate that individuals with a stronger temporal core and temporal periphery but a smooth transition between them seem to learn better than individuals with a weaker temporal core and temporal periphery but a sharper transition between them. These results suggest that successful brain function might depend on a delicate balance between a set of core regions whose allegiance to putative functional modules changes little over time and a set of peripheral regions whose allegiance to putative functional modules is flexible through time (and also on the smoothness of the transition between these two types of regions).

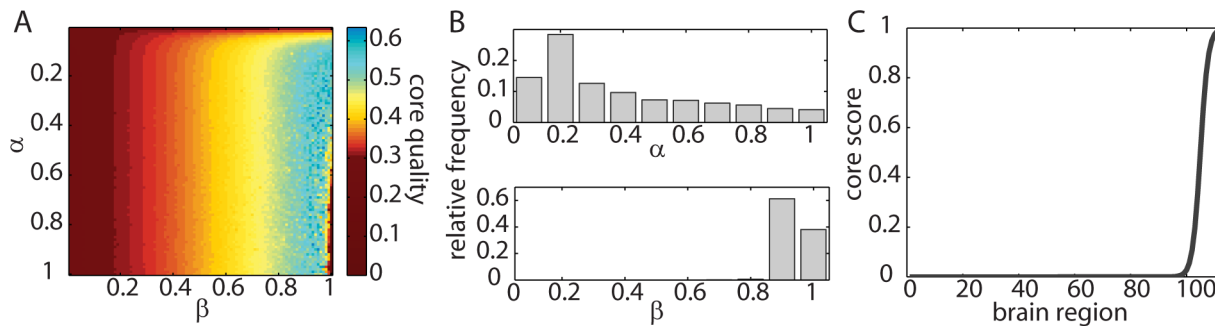

**Figure 4. Geometrical core-periphery organization in brain networks.** (A) Core quality  $R(5)$  in the  $(\alpha, \beta)$  parameter plane for a typical participant (3), scanning session (1), sequence type (EXT), and experimental block (1). (B) Distribution of the  $\alpha$  and  $\beta$  values that maximize the  $R$ -score. We compute this distribution over all network layers, participants, scanning sessions, and sequence types. The  $\beta$  parameter is much more localized (its standard deviation is 0.05) than the  $\alpha$  parameter (its standard deviation is 0.26). (C) Mean core shape. We plot the ordered vector of  $C$  values. We have set the values of  $\alpha$  and  $\beta$  to the mean values of those that maximize the  $R$ -score for all network layers, participants, scanning sessions, and sequence types.

doi:10.1371/journal.pcbi.1003171.g004

### Geometrical Core-Periphery Organization

Given our demonstration that there exists a temporal core in dynamic brain networks, it is important to ask what role such core regions might play in individual network layers of the multilayer network [17]. While the roles of nodes in a static network can be studied in multiple ways [28,29], we focus on describing the geometrical core-periphery organization—which can be used to help characterize the organization of edge strengths throughout a network—to compare it with the temporal core-periphery organization discussed above. The geometrical core of a network is composed of a set of regions that are strongly and mutually interconnected. Measures of network centrality can be useful for identifying nodes in a geometrical core because such measures help capture a node's relative importance within a network in terms of its immediate connections, its distance to other nodes in the graph, or its influence on other nodes in the graph [30,31].

Drawing on studies of social networks [18], we examine geometrical core-periphery organization in networks extracted from individual time windows by testing whether core nodes are densely connected to one another and whether peripheral nodes are sparsely connected to one another. Rather than proposing a strict separation between a single core and single periphery, we assess the role of a node along a core-periphery spectrum using a centrality measure known as the (geometrical) core score  $C$ , which was introduced in Ref. [30]. Network nodes with high  $C$  values are densely connected to one another, whereas nodes with low  $C$  values are sparsely connected to one another. The method in Ref. [30] uses a two-parameter function to interpolate between core nodes and peripheral nodes. One parameter (which is denoted by  $\alpha$ ) sets the sharpness of the boundary between the geometrical core and the geometrical periphery. Small values of  $\alpha$  indicate a fuzzy boundary, whereas large values indicate a sharp transition. The second parameter (which is denoted by  $\beta$ ) sets the size of the geometrical core. Smaller values of  $\beta$  correspond to smaller cores. We can quantify the fit of the transition function that defines the set of core scores to the data using a summary diagnostic that is called the  $R$ -score (see Materials and Methods for definitions). Large values of  $R$  indicate a good fit and therefore provide confidence that one has uncovered a good estimate of a network's core-periphery organization.

In Fig. 4A, we show a typical  $R$ -score landscape in the  $(\alpha, \beta)$  parameter plane. This landscape favors a relatively small core and a medium value of the transition-sharpness parameter. To choose sensible values of  $\alpha$  and  $\beta$  for studying core-periphery organiza-

tion, we examine the distributions of the relative frequencies of  $\alpha$  and  $\beta$  values that maximize the  $R$ -score for each network layer, participant, scanning session, and sequence type (see Fig. 4B). We use the mean values of these distributions ( $\alpha \doteq 0.40$  and  $\beta \doteq 0.94$ ) to assign a core score to each node. In Fig. 4C, we show the shape of the “mean core” that we obtain using these parameter values. This figure demonstrates that the typical (geometrical) core-periphery organization in the networks under study is a mixture between a discrete core-periphery organization, in which every node is either in the core or in the periphery, and a continuous core-periphery organization, in which there is a continuous spectrum to describe how strongly nodes belong to a core. In these networks (which usually possess a single core), the majority of nodes do not belong to the core, but those nodes that do (roughly 10% of the nodes) have a continuum level of association strengths with the core.

In some cases, we identified multiple competing cores, which we found by using simulated annealing to explore local maxima of the  $R$ -score rather than only identifying a global maximum. Because of this stochasticity in the methodology for examining core-periphery organization, we performed computations with the chosen parameter values ( $\alpha \doteq 0.40$  and  $\beta \doteq 0.94$ ) 10 times and used the solution with the highest  $R$ -score out of these 10 iterations for each network layer, subject, scanning session, and sequence type.

An interesting question is whether geometrical core-periphery organization remains relatively constant throughout time or whether the organization changes with learning. We observed that regions that have a high geometrical core score in the first scanning session and in EXT blocks were likely to have high geometrical core scores in later scanning sessions and in MOD and MIN blocks. (See the Text S1 for supporting results on the reliability of geometrical core-periphery organization.) In light of this consistency, we calculate a mean geometrical core score for each node by taking the mean over all blocks in a given scanning session (1, 2, 3, and 4) and sequence type (EXT, MOD, and MIN). The variance of the mean geometrical core score over nodes in a network then gives an indication of the separation between the mean core and periphery. As we show in Fig. 5, we find that the variance of the mean geometrical core score over trials decreases as a function of learning. A high variance of the mean core scores over nodes indicates a greater separation between the mean core and periphery as well as a high consistency of the core score of each node over trial blocks. If a node's core score is inconsistent

over trial blocks, then the mean core score for each node in the network is expected to be similar and thus one would expect the variance of the core scores over nodes to be small. A low variance in the mean geometrical core score over trial blocks therefore suggests either little separation between the core and periphery or an increased variability in core scores of a given node over trial blocks.

### Relationship between Temporal and Geometrical Core-Periphery Organization

Given the geometrical core-periphery organization in the individual layers of the multilayer networks and the temporal core-periphery organization in the full multilayer networks, it is important to ask whether brain regions in the temporal core (i.e., regions with low flexibility) are also likely to be in the geometrical core (i.e., whether they exhibit strong connectivity with other core nodes, as represented by a high value of the geometrical core score). In Fig. 6, we show scatter plots of the flexibility and core score for the 3 training levels (EXT, MOD, and MIN) and the 4 scanning sessions over the 6-week training period. We find that the temporal core-periphery organization (which is a dynamic measurement) is strongly correlated with the geometrical core score (which is a measure of network geometry and hence of network structure). This indicates that regions with low temporal flexibility tend to be strongly-connected core nodes in (static) network layers. In Fig. 6, we show that the relationship between temporal and geometrical core-periphery organization occurs reliably across training depth, duration, and intensity. In Fig. 7, we show that this relationship can also be identified robustly in data extracted from individual subjects.

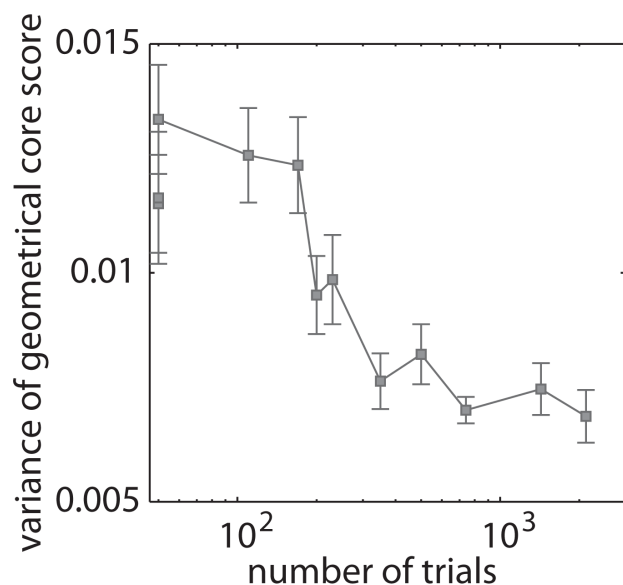

**Figure 5. Geometrical core scores change with learning.** Variance of the distribution of mean geometrical core scores over brain regions as a function of the number of trials completed after a scanning session. (See Table 1 for the relationship between the number of trials practiced and training duration and intensity.) Error bars indicate the standard error of the mean over participants (where the data point from each participant is the mean geometrical core score over brain regions, scanning sessions, sequence types, and network layers). doi:10.1371/journal.pcbi.1003171.g005

## Discussion

We have shown how the mesoscale organization of functional brain networks changes over the course of learning. Our results suggest that core-periphery organization is an important and predictive component of cognitive processes that support sequential, goal-directed behavior. We summarize our findings in Fig. 7, which demonstrates that poor learners tend to have poorer separation between core and periphery (as indicated by straighter, shorter spirals in the figure) and that good learners tend to have greater separation between core and periphery (curvier, longer spirals). Our findings also demonstrate that during the generation of motor sequences, the brain consists of a temporally stable and densely connected set of core regions complemented by a temporally flexible and sparsely connected set of peripheral regions. This functional tradeoff between a core and periphery might provide a balance between the rigidity necessary to maintain motor function by the core and the adaptivity of the periphery necessary to enable behavioral change as a function of context or strategy.

In the Text S1, we provide supporting results that indicate (i) that our findings are not merely a function of variation in region size and (ii) that they cannot be derived from the underlying block design of the experimental task. We also show in this supplement that (arguably) simpler properties of brain function—such as the regional signal power of brain activity, mean connectivity strength, and parameter estimates from a general linear model—provide less predictive power than core-periphery organization.

### Core-Periphery Organization of Human Brain Structure and Function

The notion of a core-periphery organization is based on the structure (rather than the temporal dynamics) of a network [30]. Intuitively, a core consists of a set of highly and mutually interconnected set of regions. In this paper, we have described what is traditionally called “core-periphery structure” using the terminology *geometrical core-periphery organization*. (It is geometrical rather than topological because the networks are weighted.) This intuitive notion was formalized in social networks by Borgatti and Everett in 1999 [18]. Available methods to identify and quantify geometrical core-periphery organization in networks include ones based on block models [18],  $k$ -core organization [32], and aggregation of information about connectivity and short paths through a network [33]. Unfortunately, many methods that have been used to study cores and peripheries in networks have binarized networks that are inherently weighted, which requires one to throw away a lot of important information. Even the recently developed weighted extensions of  $k$ -core decomposition [34] require a discretization of  $k$ -shells, which have been defined for both binary and weighted networks [35]. Importantly,  $k$ -core decomposition is based on a very stringent and specific type of core connectivity, so this measure misses important core-like structures [30,36]. A well-known measure called the “rich-club coefficient” (RCC) [37] considers a different but somewhat related question of whether nodes of high degree (defined as  $k \geq k_l$  some threshold value  $k_l$ ) tend to connect to other nodes of high degree. (The RCC is therefore a form of assortativity.) The RCC has also been extended to weighted networks [38], but it still requires one to specify a threshold value of richness to enable one to ask whether “rich” nodes tend to connect to other “rich” nodes.

The aforementioned limitations notwithstanding, several of the measures discussed above have recently been used successfully to identify a structural core of the human brain white-matter tract network, which is characterized not only by a  $k$ -core with a high

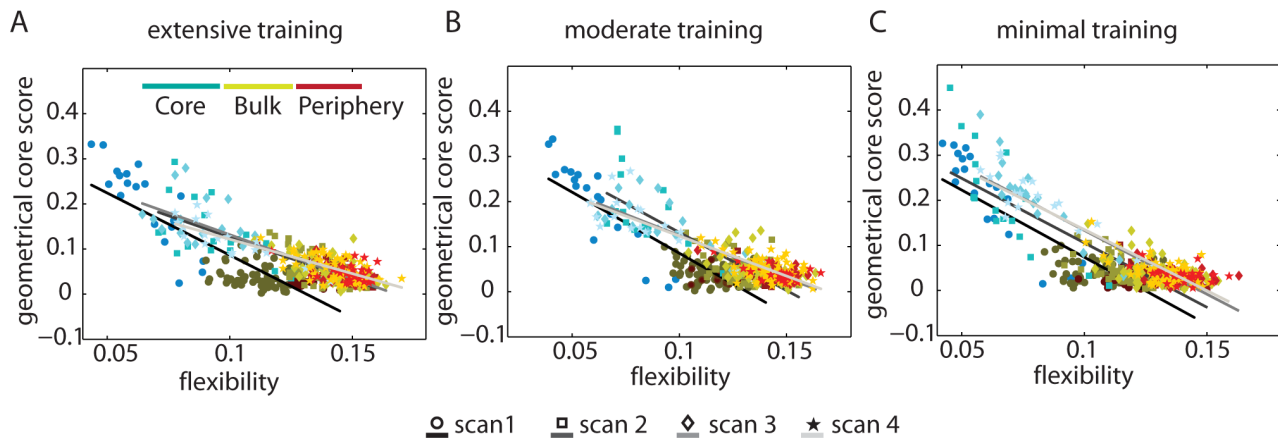

**Figure 6. Relationship between temporal and geometrical core-periphery organizations.** A strong negative correlation exists between flexibility and the geometrical core score for networks constructed from blocks of (A) extensively, (B) moderately, and (C) minimally trained sequences on scanning session 1 (day 1; circles), session 2 (after approximately 2 weeks of training; squares), session 3 (after approximately 4 weeks of training; diamonds), and session 4 (after approximately 6 weeks of training; stars). This negative correlation indicates that the temporal core-periphery organization is mimicked in the geometrical core-periphery organization and therefore that the core of dynamically stiff regions also exhibits dense connectivity. We show temporal core nodes in cyan, temporal bulk nodes in gold, and temporal periphery nodes in maroon. The darkness of data points indicates scanning session; darker colors indicate earlier scans, so the darkest colors indicate scan 1 and the lightest ones indicate scan 4. The grayscale lines indicate the best linear fits; again, darker colors indicate earlier scans, so session 1 is in gray and session 4 is in light gray. The Pearson correlation between the flexibility (averaged over 100 multilayer modularity optimizations, 20 participants, and 4 scanning sessions) and the geometrical core score (averaged over 20 participants and 4 scanning sessions) is significant for the EXT ( $r = -0.92$ ,  $p = 3.4 \times 10^{-45}$ ), MOD ( $r = -0.93$ ,  $p = 2.2 \times 10^{-49}$ ), and MIN ( $r = -0.93$ ,  $p = 4.8 \times 10^{-50}$ ) data.  
doi:10.1371/journal.pcbi.1003171.g006

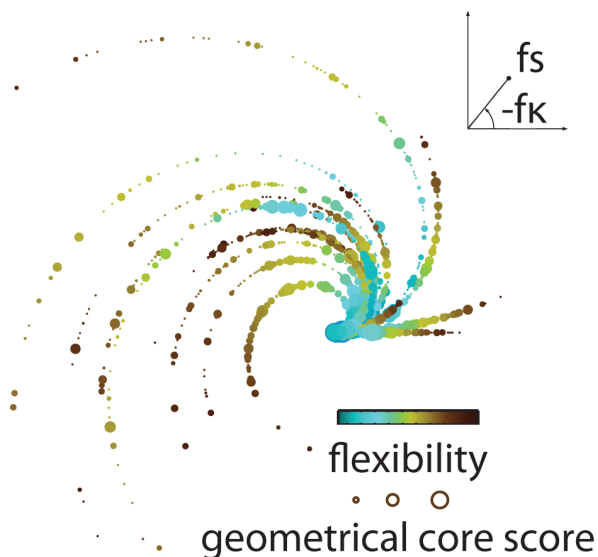

**Figure 7. Core-periphery organization of brain dynamics during learning.** The relationship between temporal and geometrical core-periphery organization and their associations with learning are present in individual subjects. We represent this relationship using spirals in a plane; data points in this plane represent brain regions located at the polar coordinates  $(f_s, -fk)$ , where  $f$  is the flexibility of the region,  $s$  is the skewness of flexibility over all regions, and  $k$  is the learning parameter (see the Materials and Methods) that describes each individual's relative improvement between sessions. The skewness predicts individual differences in learning; the Spearman rank correlation is  $\rho = -0.480$  and  $p = 0.034$ . Poor learners (straighter spirals) tend to have a low skewness (short spirals), whereas good learners (curvier spirals) tend to have high skewness (long spirals). Color indicates flexibility: blue nodes have lower flexibility, and brown nodes have higher flexibility.  
doi:10.1371/journal.pcbi.1003171.g007

value of the degree  $k$  (in particular,  $k \geq 20$ ) [34] and rich club [39,40] but also by a knotty center of nodes that have a high geodesic betweenness centrality but not necessarily a high degree [36]. A  $k$ -core decomposition has also been applied to functional brain imaging data to demonstrate a relationship between network reconfiguration and errors in task performance [41].

A novel approach that is able to overcome many of these conceptual limitations is the geometrical core-score [30], which is an inherently continuous measure, is defined for weighted networks, and can be used to identify regions of a network core without relying solely on their degree or strength (i.e., weighted degree). Moreover, by using this measure, one can produce (i) continuous results, which make it possible to measure whether a brain region is more core-like or periphery-like; (ii) a discrete classification of core versus periphery; or (iii) a finer discrete division (e.g., into 3 or more groups). In addition, this method can identify multiple geometrical cores in a network and rank nodes in terms of how strongly they participate in different possible cores. This sensitivity is particularly helpful for the examination of brain networks for which multiple cores are hypothesized to mediate multimodal integration [42]. In this paper, we have demonstrated that functional brain networks derived from task-based data acquired during goal-directed brain activity exhibit geometrical core-periphery organization. Moreover, they are specifically characterized by a straightforward core-periphery landscape that includes a relatively small core composed of roughly 10% or so of the nodes in the network.

In this paper, we have introduced a method and associated definitions to identify a *temporal* core-periphery organization based on changes in a node's module allegiance over time. We have defined the notion of a temporal core as a set of regions that exhibit fewer changes in module allegiance over time than expected in a dynamic-network null model. Neurobiologically, the temporal core contains brain areas that show consistent task-based mesoscale functional connectivity over the course of an experiment, and it is therefore perhaps unsurprising that their

anatomical locations differ from nodes in the ( $k \geq 20$ )-core [34] and RCC [39,40] of the human white matter tract network. Our approach is inspired by the following idea: although the brain uses the function of a small subset of regions to perform a given task (i.e., some sort of core), a set of additional regions that are associated more peripherally with the task might also be activated in a transient manner. Indeed, several recent studies have highlighted the possibility of a separation between groups of regions that are consistently versus transiently activated during task-related function [43,44], and they have demonstrated that correlations between such regions can be altered depending on their activity [43,45].

Given the very different definitions of the geometrical and temporal cores, it is interesting that nodes in the temporal core are also likely to be present in the geometrical core. Importantly, the notions of temporal and geometrical core are complementary, and they are both intuitive in the context of brain function. A set of regions that is coherently active to perform a task (i.e., is in the geometrical core) must remain online consistently throughout an experiment (i.e., be in the temporal core), whereas a set of regions that might be activated less coherently (i.e., is in the geometrical periphery) can be utilized by separate putative functional modules over time (i.e., it can be in the temporal periphery). This interpretation is consistent with the notion that the anatomical locations of the core and periphery are task-specific. Should brain activity during other tasks also exhibit core-periphery organization, then the core and periphery of these other task networks could consist of a different set of anatomical regions than those observed here. A comparison of dynamic community structure and associated mesoscale organizational properties across brain states elicited by other tasks is outside of the scope of the present study. However, such a study in a controlled sample with similar time-series length and experimental task structure (e.g., trial lengths, block lengths, and rest periods) would likely yield important insights.

### Modular versus Core-Periphery Organization

Community structure and core-periphery organization are two types of mesoscale structures, and they can both be present simultaneously in a network [30,36]. Moreover, both modular and core-periphery organization can in principle pertain to different characteristics of or constraints on underlying brain function. In particular, the presence of community structure supports the idea of the brain containing putative functional modules, whereas the presence of a core-periphery organization underscores the fact that different brain regions likely play inherently different roles in information processing. A symbiosis between these two types of organization is highlighted by the findings that we report in this manuscript: the dynamic reconfiguration of putative functional modules can be described parsimoniously by temporal core-periphery organization, demonstrating that one type of mesoscale structure can help to characterize another. Furthermore, the notion that the brain can simultaneously contain functional modules (e.g., the executive network or the default-mode network) and regions that transiently mediate interactions between modules is consistent with recent characterizations of attention and cognitive control processes [46].

### Dynamic Brain Networks

It is increasingly apparent that functional connectivity in the brain changes over time and that these changes are biologically meaningful. Several recent studies have highlighted the temporal variability [47–50] and non-stationarity [51] of functional brain network organization, and both of these features are apparent over

short time intervals (less than 5 minutes in fMRI; less than 100 s in EEG) [47–49]. Although temporal variability in functional connectivity was seen initially as a signature of measurement noise [51], recent evidence suggests instead that it might provide an indirect measurement of changing cognitive processes. Thus, it might serve as a diagnostic biomarker of disease [51,52]. Moreover, such temporal variability appears to be modulated by exogenous inputs. For example, Barnes et al. [53] demonstrated using a continuous acquisition “rest-task-rest” design that endogenous brain dynamics do not return to their pre-task state until approximately 18 minutes following task completion. Similar results that consider other tasks have also been reported [54]. More generally, the dynamic nature of brain connectivity is likely linked to spontaneous cortical processing, reflecting a combination of both stable and transient communication pathways [48,49,55].

### Network Predictions of Future Learning

In this study, we observed that properties of the temporal organization of functional brain networks (e.g., on day 1 of this experiment) can be used to predict extended motor learning (e.g., on the following 10 days of home training on a discrete sequence-production task). Our findings are consistent with two previous studies that demonstrated a predictive connection between both dynamic [17] and topological [56] network organization and subsequent learning. (Note that we use the term *topological* because Ref. [56] considered only unweighted networks.) Reference [17] focused on early—rather than extended—learning of a cued sequence-production motor task (rather than a discrete one) and found that network flexibility on the first day of experiments predicted learning on the second day and that flexibility on the second day predicted learning on the third day. Reference [56] investigated participants’ success in learning words of an artificial spoken language and found that network properties from individual time windows could be used to predict such success [56]. Together with the present study, these results highlight the potential breadth of the relationship between network organization and learning. The presence of such a relationship has now been identified across multiple tasks, over multiple time scales, and using both dynamic and topological network properties.

### Methodological Considerations

Our study has focused on large-scale changes in dynamic community structure that are correlated with learning. Finer-scale investigations that employ alternative parcellation schemes [57–62] with greater spatial resolution or alternative neuroimaging techniques such as EEG or MEG [55] with greater temporal resolution might uncover additional features that would enhance understanding of functional network-based predictors of learning phenomena.

Throughout this paper, we have referred to feature similarities (which we estimated using the magnitude squared coherence) between pairs of regional BOLD time series as *functional connectivity* [63]. As appreciated in prior literature [64–66], the interpretation of functional connectivity must be made with caution. Coherence in the activity recorded at different brain sites does not necessitate that those sites share information with one another to enable cognitive processing, as they could instead indicate that those two sites are activated by the same third party (either another brain region or an external stimulus). In this paper, we do not distinguish between these two possible drivers of strong inter-regional coherence. Future studies could employ multiple estimates of statistical associations in the form of diagnostics [67–69] and/or models [70,71] that might uncover other sets of interactions that

could predict the observed coherence structure and hence the observed behavior.

## Materials and Methods

### Experiment and Data Acquisition

**Ethics statement.** Twenty-two right-handed participants (13 females and 9 males; the mean age was about 24) volunteered with informed consent in accordance with the Institutional Review Board/Human Subjects Committee, University of California, Santa Barbara.

**Experiment setup and procedure.** We excluded two participants from the investigation: one participant failed to complete the experiment, and the other had excessive head motion. Our investigation therefore includes twenty participants, who all had normal/corrected vision and no history of neurological disease or psychiatric disorders. Each of these participants completed a minimum of 30 behavioral training sessions as well as 3 fMRI test sessions and a pre-training fMRI session. Training began immediately following the initial pre-training scan session. Test sessions occurred after every 2-week period of behavioral training, during which at least 10 training sessions were required. The training was done on personal laptop computers using a training module that was installed by the experimenter (N.F.W.). Participants were given instructions for how to run the module, which they were required to do for a minimum of 10 out of 14 days in a 2-week period. Participants were scanned on the first day of the experiment (scan 1), and then a second time approximately 14 days later (scan 2), once again approximately 14 days later (scan 3), and finally 14 days after that (scan 4). Not all participants were scanned exactly every two weeks; see Table S1 for details of the number of days that elapsed between scanning sessions.

We asked participants to practice a set of 10-element sequences that were presented visually using a discrete sequence-production (DSP) task by generating responses to sequentially presented stimuli (see Fig. 8) using a laptop keyboard with their right hand. Sequences were presented using a horizontal array of 5 square stimuli; the responses were mapped from left to right, such that the thumb corresponded to the leftmost stimulus and the smallest finger corresponded to the rightmost stimulus. A square highlighted in red served as the imperative to respond, and the next square in the sequence was highlighted immediately following each correct key press. If an incorrect key was pressed, the sequence was paused at the error and was restarted upon the generation of the appropriate key press.

Participants had an unlimited amount of time to respond and to complete each trial. All participants trained on the same set of 6 different 10-element sequences, which were presented with 3 different levels of exposure. We organized sequences so that each stimulus location was presented twice and included neither stimulus repetition (e.g., “11” could not occur) nor regularities such as trills (e.g., “121”) or runs (e.g., “123”). Each training session (see Fig. 9) included 2 extensively trained sequences (“EXT”) that were each practiced for 64 trials, 2 moderately trained sequences (“MOD”) that were each practiced for 10 trials, and 2 minimally trained sequences (“MIN”) that were each practiced for 1 trial. (See Table S1 for details of the number of trials composed of extensively, moderately, and minimally trained sequences during home training sessions.) Each trial began with the presentation of a sequence-identity cue. The purpose of the identity cue was to inform the participant what sequence they were going to have to type. For example, the EXT sequences were preceded by either a cyan (sequence A) or magenta (sequence B) circle. Participants saw additional identity cues for the MOD

sequences (red or green triangles) and for the MIN sequences (orange or white stars, each of which was outlined in black). No participant reported any difficulty viewing the different identity cues. Feedback was presented after every block of 10 trials; this feedback detailed the number of error-free sequences that the participant produced and the mean time it took to complete an error-free sequence.

Each fMRI test session was completed after approximately 10 home training sessions (see Table S1 for details of the number of home practice sessions between scanning sessions), and each participant participated in 3 test sessions. In addition, each participant had a pre-training scan session that was identical to the other test scan sessions immediately prior to the start of training (see Fig. 9). To familiarize participants with the task, we gave a brief introduction prior to the onset of the pre-training session. We showed the participants the mapping between the fingers and the DSP stimuli, and we explained the significance of the sequence-identity cues.

To help ease the transition between each participant’s training environment and that of the scanner, padding was placed under his/her knees to maximize comfort. Participants made responses using a fiber-optic response box that was designed with a similar configuration of buttons as those found on the typical laptop used during training. See the lower left of Fig. 8 for a sketch of the button box used in the experiments. For instance, the center-to-center spacing between the buttons on the top row was 20 mm (compared to 20 mm from “G” to “H” on a recent MacBook Pro), and the spacing between the top row and lower left “thumb” button was 32 mm (compared to 37 mm from “G” to the spacebar on a MacBook Pro). The response box was supported using a board whose position could be adjusted to accommodate a participant’s reach and hand size. Additional padding was placed under the right forearm to minimize muscle strain when a participant performed the task. Head motion was minimized by inserting padded wedges between the participant and the head coil of the MRI scanner. The number of sequence trials performed during each scanning session was the same for all participants, except for two abbreviated sessions that resulted from technical problems. In each case that scanning was cut short, participants completed 4 out of the 5 scan runs for a given session. We included data from these abbreviated sessions in this study.

Participants were tested inside of the scanner with the same DSP task and the same 6 sequences that they performed during training. Participants were given an unlimited time to complete trials, though they were instructed to respond quickly but also to maintain accuracy. Trial completion was signified by the visual presentation of a fixation mark “+”, which remained on the screen until the onset of the next sequence-identity cue. To acquire a sufficient number of events for each exposure type, all sequences were presented with the same frequency. Identical to training, trials were organized into blocks of 10 followed by performance feedback. Each block contained trials belonging to a single exposure type and included 5 trials for each sequence. Trials were separated by an inter-trial interval (ITI) that lasted between 0 and 6 seconds (not including any time remaining from the previous trial). Scan epochs contained 60 trials (i.e., 6 blocks) and consisted of 20 trials for each exposure type. Each test session contained 5 scan epochs, yielding a total of 300 trials and a variable number of brain scans depending on how quickly the task was performed. See Table S2 for details of the number of scans in each experimental block.

**Behavioral apparatus.** Stimulus presentation was controlled during training using a participant’s laptop computer, which was running Octave 3.2.4 (an open-source program that is very similar

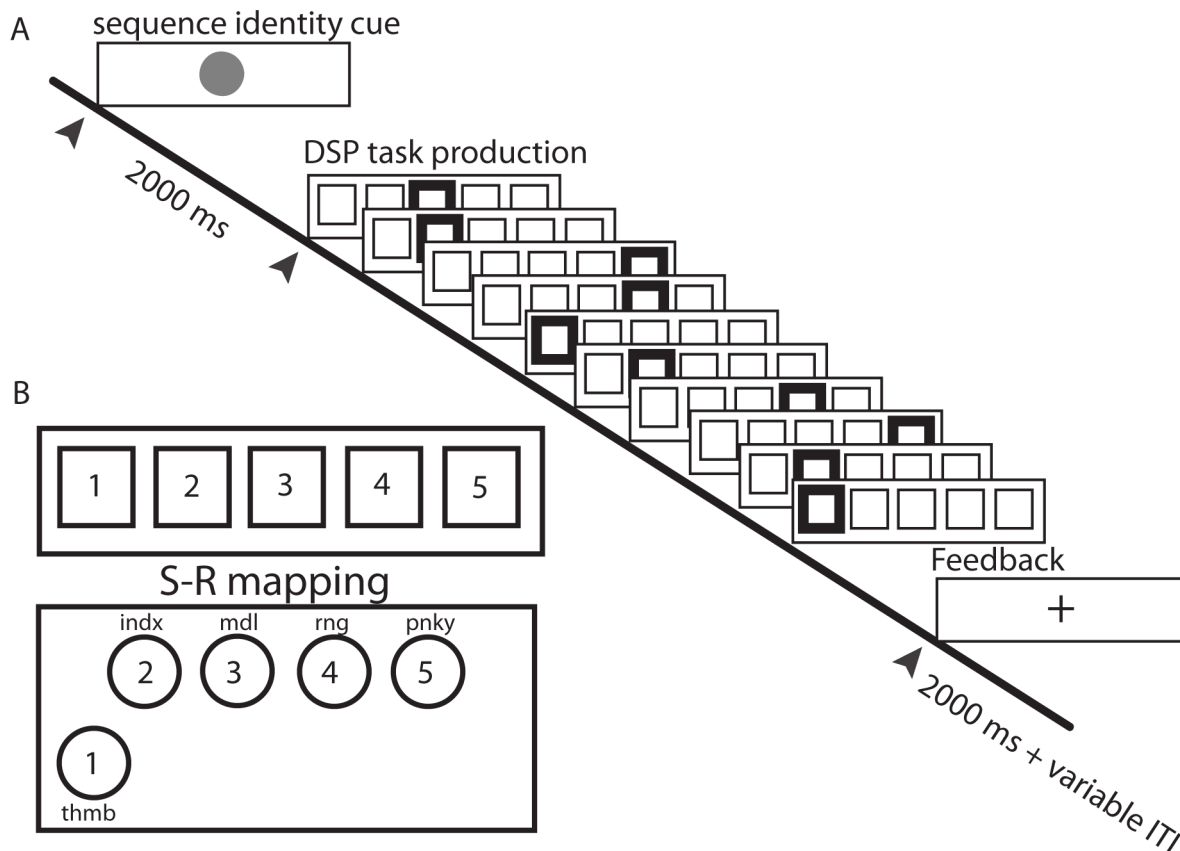

**Figure 8. Trial structure and stimulus-response (S-R) mapping.** (A) Each trial began with the presentation of a sequence-identity cue that remained on screen for 2 seconds. Each of the 6 trained sequences was paired with a unique identity cue. A discrete sequence-production (DSP) event structure was used to guide sequence production. The onset of the initial DSP stimulus (thick square, colored red in the task) served as the imperative to produce the sequence. A correct key press led to the immediate presentation of the next DSP stimulus (and so on) until the 10-element sequence was correctly executed. Participants received a feedback “+” to signal that a sequence was completed and to wait (approximately 0–6 seconds) for the start of the next trial. This waiting period is called the “inter-trial interval” (ITI). At any point, if an incorrect key was hit, a participant would receive an error signal (not shown in the figure) and the DSP sequence would pause until the correct response was received. (B) There was a direct S-R mapping between a conventional keyboard or an MRI-compatible button box (see the lower left of the figure) and a participant’s right hand, so the leftmost DSP stimulus cued the thumb and the rightmost stimulus cued the pinky finger. Note that the button location for the thumb was positioned to the lower left to achieve maximum comfort and ease of motion.  
doi:10.1371/journal.pcbi.1003171.g008

to MATLAB) in conjunction with Psychtoolbox Version 3. We controlled test sessions using a laptop computer running MATLAB version 7.1 (Mathworks, Natick, MA). We collected key-press responses and response times using a custom fiber-optic button box and transducer connected via a serial port (button box: HHSC-1 × 4-L; transducer: fORP932; Current Designs, Philadelphia, PA).

**Behavioral estimates of learning.** Our goal was to study the relationship between brain organization and learning. To ensure independence of these two variables, we extracted brain network structure during the 4 scanning sessions, and we extracted behavioral estimates of learning in home training sessions 1–10 (approximately between days 1 and 14; see Table S1), which took place before scanning session 2.

For each sequence, we defined the movement time (MT) as the difference between the time of the first button press and the time of the last button press during a single sequence. For the set of sequences of a single type (i.e., sequence 1, 2, 3, 4, 5, or 6), we estimated the learning rate by fitting an exponential function (plus a constant) to the MT data [72,73] using a robust outlier correction in MATLAB (using the function `fit.m` in the Curve Fitting Toolbox with option “Robust” and type “Lar”):

$$MT = D_1 e^{t/\kappa} + D_2, \quad (1)$$

where  $t$  is time,  $\kappa$  is the exponential dropoff parameter (which we call the “learning parameter”) used to describe the early (and fast) rate of improvement, and  $D_1$  and  $D_2$  are real and positive constants. The sum  $D_1 + D_2$  is an estimate of the starting speed of a given participant prior to training, and the parameter  $D_2$  is an estimate of the fastest speed attainable by that participant after extended training. A negative value of  $\kappa$  indicates a decrease in MT, which is thought to indicate that learning is occurring [74,75]. This decrease in MT has been used to quantify learning for several decades [76,77]. Several functional forms have been suggested for the fit of MT [78,79], and the exponential (plus constant) is viewed as the most statistically robust choice [79]. Additionally, the fitting approach that we used has the advantage of estimating the rate of learning independent of initial performance or performance ceiling.

### Functional MRI (fMRI) Imaging

**Imaging procedures.** We acquired fMRI signals using a 3.0 T Siemens Trio with a 12-channel phased-array head coil. For

## experiment timeline

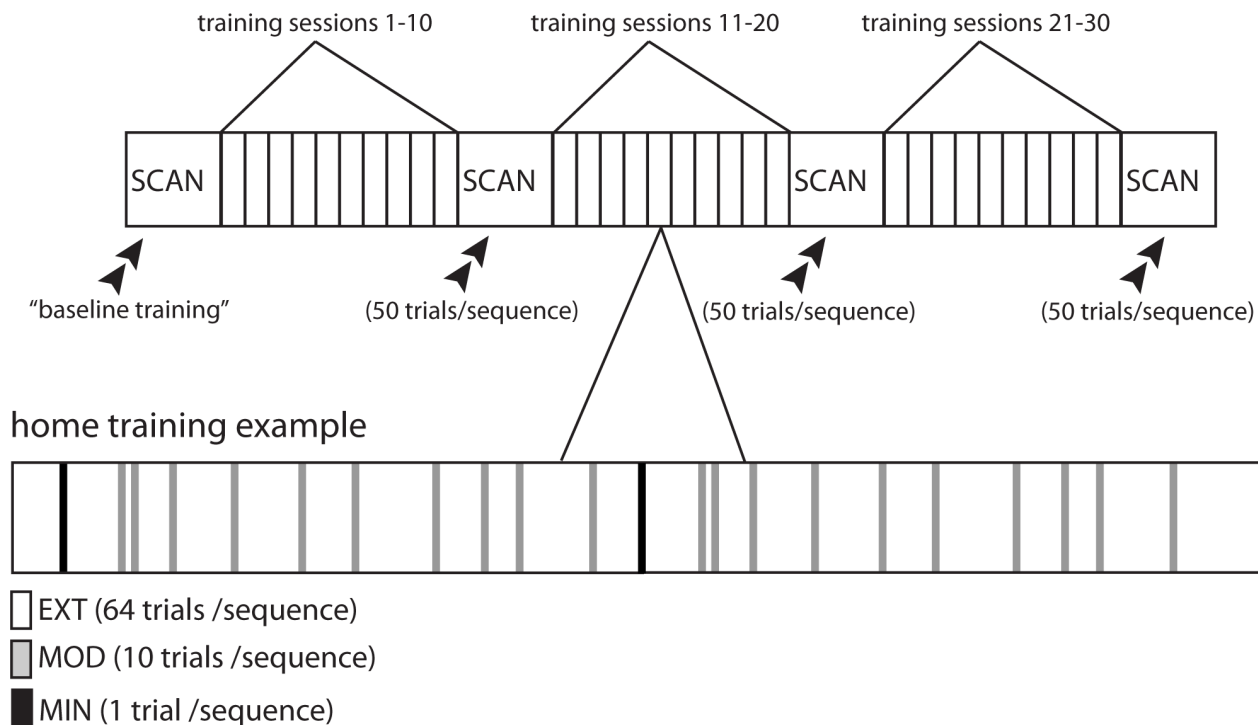

**Figure 9. Experiment timeline.** Training sessions in the MRI scanner during the collection of blood-oxygen-level-dependent (BOLD) signals were interleaved with training sessions at home. Participants first practiced the sequences in the MRI scanner during a baseline training session (*top*). Following every approximately 10 training sessions (see Table S1), participants returned for another scanning session. During each scanning session, a participant practiced each sequence for 50 trials. Participants trained at home between the scanning sessions (*bottom*). During each home training session, participants practiced the sequences in a random order. (We determined a random order using the Mersenne Twister algorithm of Nishimura and Matsumoto [101] as implemented in the random number generator `rand.m` of MATLAB version 7.1). Each EXT sequence was practiced for 64 trials, each MOD sequence was practiced for 10 trials, and each MIN sequence was practiced for 1 trial. doi:10.1371/journal.pcbi.1003171.g009

each scan epoch, we used a single-shot echo planar imaging sequence that is sensitive to BOLD contrast to acquire 37 slices per repetition time (TR of 2000 ms, 3 mm thickness, 0.5 mm gap) with an echo time (TE) of 30 ms, a flip angle of 90 degrees, a field of view (FOV) of 192 mm, and a  $64 \times 64$  acquisition matrix. Before the collection of the first functional epoch, we acquired a high-resolution T1-weighted sagittal sequence image of the whole brain (TR of 15.0 ms, TE of 4.2 ms, flip angle of 9 degrees, 3D acquisition, FOV of 256 mm, slice thickness of 0.89 mm, and  $256 \times 256$  acquisition matrix).

**fMRI data preprocessing.** We processed and analyzed functional imaging data using Statistical Parametric Mapping (SPM8, Wellcome Trust Center for Neuroimaging and University College London, UK). We first realigned raw functional data, then coregistered it to the native T1 (normalized to the MNI-152 template with a re-sliced resolution of  $3 \times 3 \times 3$  mm), and finally smoothed it using an isotropic Gaussian kernel of 8 mm full-width at half-maximum. To control for potential fluctuations in signal intensity across the scanning sessions, we normalized global intensity across all functional volumes.

## Network Construction

**Partitioning the brain into regions of interest.** Brain function is characterized by spatial specificity: different portions of the cortex emit different, task-dependent activity patterns. To study regional specificity of the functional time series and putative

interactions between brain areas, it is common to apply a standardized atlas to raw fMRI data [7,80,81]. The choice of atlas or parcellation scheme is the topic of several recent studies in structural [57,60], resting-state [58], and task-based [59] network architecture. The question of the most appropriate delineation of the brain into nodes of a network is an open one and is guided by the particular scientific question at hand [5,61].

Consistent with previous studies of task-based functional connectivity during learning [15,17,82], we parcellated the brain into 112 identifiable cortical and subcortical regions using the structural Harvard-Oxford (HO) atlas (see Table S3) installed with the FMRIB (Oxford Centre for Functional Magnetic Resonance Imaging of the Brain) Software Library (FSL; Version 4.1.1) [83,84]. For each individual participant and each of the 112 regions, we determined the regional mean BOLD time series by separately averaging across all of the voxels in that region.

Within each HO-atlas region, we constrained voxel selection to voxels that are located within an individual participant's gray matter. To do this, we first segmented each individual participant's T1 into white and gray matter volumes using the DARTEL toolbox supplied with SPM8. We then restricted the gray-matter voxels to those with an intensity of 0.3 or more (the maximum intensity was 1.0). Note that units are based on an arbitrary scale. We then spatially normalized the participant T1 and corresponding gray matter volume to the MNI-152 template—using the standard SPM 12-parameter affine registration from the native

images to the MNI-152 template image—and resampled to 3 mm isotropic voxels. We then restricted the voxels for each HO region by using the program `fslmaths` [83,84] to include only voxels that are in the individual participant's gray-matter template.

**Wavelet decomposition.** Brain function is also characterized by frequency specificity. Different cognitive and physiological functions are associated with different frequency bands, and this can be investigated using wavelets. Wavelet decompositions of fMRI time series have been applied extensively in both resting-state and task-based conditions [85,86]. In both cases, they provide sensitivity for the detection of small signal changes in non-stationary time series with noisy backgrounds [87]. In particular, the maximum-overlap discrete wavelet transform (MODWT) has been used extensively in connectivity investigations of fMRI [88–93]. Accordingly, we used MODWT to decompose each regional time series into wavelet scales corresponding to specific frequency bands [94].

We were interested in quantifying high-frequency components of an fMRI signal, correlations between which might be indicative of cooperative temporal dynamics of brain activity during a task. Because our sampling frequency was 2 seconds (1 TR = 2 sec), wavelet scale one provides information on the frequency band 0.125–0.25 Hz and wavelet scale two provides information on the frequency band 0.06–0.125 Hz. Previous work has indicated that functional associations between low-frequency components of the fMRI signal (0–0.15 Hz) can be attributed to task-related functional connectivity, whereas associations between high-frequency components (0.2–0.4 Hz) cannot [95]. This frequency specificity of task-relevant functional connectivity is likely due at least in part to the hemodynamic response function, which might act as a noninvertible band-pass filter on underlying neural activity [95]. Consistent with our previous work [17], we examined wavelet scale two, which is thought to be particularly sensitive to dynamic changes in task-related functional brain architecture.

**Construction of dynamic networks.** For each of the 112 brain regions, we extracted the wavelet coefficients of the mean time series in temporal windows given by trial blocks (of approximately 60 TRs; see Table S2). The leftmost temporal boundary of each window was equal to the first TR of an experimental trial block, and the rightmost boundary was equal to the last TR in the same block. We thereby extracted block-specific data sets from the EXT, MOD, and MIN sequences (with 6–10 blocks of each sequence type; see Table S2 for details of the number of blocks of each sequence type) for each of the 20 participants participating in the experiment and for each of the 4 scanning sessions.

For each block-specific data set, we constructed an  $N \times N$  adjacency matrix  $\mathbf{W}$  representing the complete set of pairwise functional connections present in the brain during that window in a given participant and for a given scan. Note that  $N = 112$  is the number of brain regions in the full brain atlas (see the earlier section on “Partitioning the Brain into Regions of Interest” for further details). To quantify the weight  $W_{ij}$  of functional connectivity between regions labeled  $i$  and  $j$ , we used the magnitude squared spectral coherence as a measure of nonlinear functional association between any two wavelet coefficient time series (consistent with our previous study [17]). In using the coherence, which has been demonstrated to be useful in the context of fMRI neuroimaging data [95], we were able to measure frequency-specific linear relationships between time series.

To examine changes in functional brain network architecture during learning, we constructed multilayer networks by considering the set of  $L$  adjacency matrices constructed from consecutive blocks of a given sequence type (EXT, MOD, or MIN) in a given

participant and scanning session. We combined the matrices in each set separately to form a rank-3 adjacency tensor  $\mathbf{A}$  per sequence type, participant, and scan. Such a tensor can be used to represent a time-dependent network [14,17]. In the following sections, we describe a variety of diagnostics that can be used to characterize such multilayer structures.

## Network Examination

**Dynamic community detection.** Community detection [12,13] can be used to identify putative functional modules (i.e., sets of brain regions that exhibit similar trajectories through time). One such technique is based on the optimization of the modularity quality function [96–98]. This allows one to identify groups that consist of nodes that have stronger connections among themselves than they do to nodes in other groups [12]. Recently, the modularity quality function has been generalized so that one can consider time-dependent or multiplex networks using *multilayer modularity* [14]

$$Q = \frac{1}{2\mu} \sum_{ijl} \{ (A_{ijl} - \gamma_l P_{ijl}) \delta_{lr} + \delta_{ij} \omega_{jlr} \} \delta(g_{il}, g_{jr}), \quad (2)$$

where the adjacency matrix of layer  $l$  has components  $A_{ijl}$ , the element  $P_{ijl}$  gives the components of the corresponding matrix for a null model,  $\gamma_l$  is the structural resolution parameter of layer  $l$ , the quantity  $g_{il}$  gives the community (i.e., “module”) assignment of node  $i$  in layer  $l$ , the quantity  $g_{jr}$  gives the community assignment of node  $j$  in layer  $r$ , the parameter  $\omega_{jlr}$  is the connection strength—i.e., “interlayer coupling parameter”, which gives an element of a tensor  $w$  that constitutes a set of *temporal resolution parameters* if one is using the adjacency tensor  $\mathbf{A}$  to represent a time-dependent network—between node  $j$  in layer  $r$  and node  $j$  in layer  $l$ , the total edge weight in the network is  $\mu = \frac{1}{2} \sum_{jr} \kappa_{jr}$ , the strength of node  $j$  in layer  $l$  is  $\kappa_{jl} = k_{jl} + c_{jl}$ , the intra-layer strength of node  $j$  in layer  $l$  is  $k_{jl}$ , and the inter-layer strength of node  $j$  in layer  $l$  is  $c_{jl} = \sum_r \omega_{jlr}$ . We employ the Newman-Girvan null model within each layer by using

$$P_{ijl} = \frac{k_{il} k_{jl}}{2m_l}, \quad (3)$$

where  $m_l = \frac{1}{2} \sum_{ij} A_{ijl}$  is the total edge weight in layer  $l$ . We let  $\omega_{jlr} \equiv \omega = \text{constant}$  for neighboring layers (i.e., when  $|l-r|=1$ ) and  $\omega_{jlr} = 0$  otherwise. We also let  $\gamma_l = \gamma = \text{constant}$ . In the main text, we report results for  $\omega = 1$  and  $\gamma = 1$ , and we evaluate the dependence of our results on  $\gamma$  and  $\omega$  in the Text S1.

Optimization of multilayer modularity (2) yields a partition of the brain regions into communities for each time window. To measure changes in the composition of communities across time (i.e., across experimental blocks), we defined the *flexibility*  $f_i$  of a node  $i$  to be the number of times that a node changed community assignment throughout the set of time windows represented by the multilayer network [17] normalized by the total number of changes that were possible (i.e., by the number of contiguous pairs of layers in the multilayer framework, which in this study ranged from 4 to 10; see Table S2). We then defined the flexibility of the entire network as the mean flexibility over all nodes in the network:  $F = \frac{1}{N} \sum_{i=1}^N f_i$ . To examine the relationship between brain network flexibility and learning, we confined ourselves to the two EXT (i.e., extensively trained) sequences, in which learning occurs more rapidly than in MOD and MIN sequences. We therefore estimated flexibility from the multilayer networks

constructed from blocks of the two EXT sequences in the first scanning session.

**Identification of temporal core, bulk, and periphery.** We find that different brain regions have different flexibilities. To determine whether a particular brain region is more or less flexible than expected, we constructed a *nodal null model*, which can be used to probe the individual roles of nodes in a network [15,17]. (Note that alternative null models can be used to probe other aspects of the temporal or geometrical structure in a multilayer network [15,17].) We rewired the ends of the multilayer network's inter-layer edges (which connect nodes in one layer to nodes in another) uniformly at random. After applying the associated permutation, an inter-layer edge can, for example, connect node  $i$  in layer  $t$  with node  $j \neq i$  in layer  $t+1$  rather than being constrained to connect each node  $i$  in layer  $t$  with itself in layer  $t+1$ .

We considered 100 different rewirings to construct an ensemble of 100 nodal null-model multilayer networks for each single multilayer network constructed from the brain data. We then estimated the flexibility of each node in each nodal null-model network. We created a distribution of expected mean nodal flexibility values by averaging flexibility over 100 rewirings and the 20 participants. We similarly estimated the mean nodal flexibility of the brain data by averaging flexibility over the 20 participants and 100 optimizations. (We optimized multilayer modularity using a Louvain-like locally greedy method [99,100]. This procedure is not deterministic, so different runs of the optimization procedure can yield slightly different partitions of a network.) We considered a region to be a part of the temporal “core” if its mean nodal flexibility was below the 2.5% confidence bound of the null-model distribution, and we considered a region to be a part of the temporal “periphery” if its mean nodal flexibility was above the 97.5% confidence bound of the null-model distribution. Finally, we considered a region to be a part of the temporal “bulk” if its mean nodal flexibility was between the 2.5% and 97.5% confidence bounds of the null-model distribution.

**Geometrical core-periphery organization.** To estimate the geometrical core-periphery organization of the (static) networks defined by each experimental block (i.e., for each layer of a multilayer network), we used the method that was recently proposed in Ref. [30]. This method results in a “core score” (which constitutes a centrality measure) for each node that indicates where it lies on a continuous spectrum of roles between core and periphery. This method has numerous advantages over previous formulations used to study core-periphery organization. In particular, it can identify multiple geometrical cores in a network, which makes it possible to take multiple cores into account and in turn enables one to construct a detailed description of geometrical core-periphery organization by ranking the nodes in terms of how strongly they participate in different possible cores. Importantly, the continuous nature of the measure removes the need to use an artificial dichotomy of being strictly a core node versus strictly a peripheral node.

In applying method, we consider a vector  $C$  with non-negative values, and we let  $C_{ij} = C_i \times C_j$ , where  $i$  and  $j$  are two nodes in an  $N$ -node network. We then seek a core vector  $C$  that satisfies the normalization condition

$$\sum_{i,j} C_i C_j = 1$$

and is a permutation of the vector  $C^*$  whose components specify the *local (geometrical) core values*

$$C_m^* = \frac{1}{1 + \exp\{-(m - N\beta) \times \tan(\pi\alpha/2)\}}, \quad m \in \{1, \dots, N\}. \quad (4)$$

We seek a permutation that maximizes the *core quality*

$$R = \sum_{i,j} A_{ij} C_i C_j. \quad (5)$$

This method to compute core-periphery organization has two parameters:  $\alpha \in [0,1]$  and  $\beta \in [0,1]$ . The parameter  $\alpha$  sets the sharpness of the boundary between the geometrical core and the geometrical periphery. The value  $\alpha=0$  yields the fuzziest boundary, and  $\alpha=1$  gives the sharpest transition (i.e., a binary transition): as  $\alpha$  varies from 0 to 1, the maximum slope of  $C^*$  varies from 0 to  $+\infty$ . The parameter  $\beta$  sets the size of the geometrical core: as  $\beta$  varies from 0 to 1, the number of nodes included in the core varies from  $N$  to 0. One now has the choice of either taking into account the local core scores of a node for a set of  $(\alpha, \beta)$  coordinates sampled from  $[0,1] \times [0,1]$  (where one weighs each choice by its corresponding value of  $R$ ) or one can take into account only the score for particular choices of  $(\alpha, \beta)$ .

## Statistics and Software

We performed all data analysis and statistical tests in MATLAB. We performed the dynamic community detection procedure using freely available MATLAB code [99] that optimizes multilayer modularity using a Louvain-like locally greedy algorithm [100].

## Supporting Information

**Figure S1 Reliability of temporal core-periphery structure.** Temporal core (cyan), bulk (gold), and periphery (maroon) of dynamic networks determined based on the flexibility of trial blocks in which participants practiced sequences that would eventually be extensively trained. (A) Flexibility of the temporal core, bulk, and periphery averaged over the 100 multilayer modularity optimizations and 20 participants for blocks composed of extensively trained (EXT; light circles), moderately trained (MOD; squares), and minimally trained (MIN; dark diamonds) sequences. The darkness of data points indicates scanning session; darker colors indicate earlier scans, so the darkest colors indicate scan 1 and the lightest ones indicate scan 4. (B) The coefficient of variation of flexibility calculated over the 100 optimizations and 3 sequence types for all brain regions. Error bars indicate the standard error of the mean CV over participants. Both panels use data from scanning session 1 on day 1 of the experiment (which is prior to home training). (EPS)

**Figure S2 Temporal core-periphery organization over 42 days.** Temporal core (cyan), bulk (gold), and periphery (maroon) of dynamic networks defined by trial blocks in which participants practiced sequences that would eventually be (A) extensively trained, (B) moderately trained, and (C) minimally trained for data from scanning sessions 2 (after approximately 2 weeks of training; circles), 3 (after approximately 4 weeks of training; squares), and 4 (after approximately 6 weeks of training; diamonds). The darkness of data points indicates scanning session; darker colors indicate earlier scans, so the darkest colors indicate scan 1 and the lightest ones indicate scan 4. (EPS)

**Figure S3 Geometrical core-periphery organization over 42 days.** Geometrical core scores for each brain region

defined by the trial blocks in which participants practiced sequences that would eventually be (A) extensively trained, (B) moderately trained, and (C) minimally trained for data from scanning sessions 1 (day 1; black circles), 2 (after approximately 2 weeks of training; dark gray squares), 3 (after approximately 4 weeks of training; gray diamonds), and 4 (after approximately 6 weeks of training; light gray stars). We have averaged the geometrical core scores over blocks and over 20 participants. The order of brain regions is identical for all 3 panels (A–C), and we chose this order by ranking regions from high to low geometrical core scores from the EXT blocks on scanning session 1 (on day 1 of the experiment). (EPS)

**Figure S4 Relationship between temporal core-periphery organization and community structure.** (A) Mean-coherence matrix over all EXT blocks from all participants on scanning day 1. The colored bars above the matrix indicate the 3 communities that we identified from the representative partition. Mean partition similarity z-score  $z_i$  over all participants for blocks of (B) extensively, (C) moderately, and (D) minimally trained sequences for all 4 scanning sessions over the approximately 6 weeks of training. The horizontal gray lines in panels (B–D) indicate the  $z_i$  value that corresponds to a right-tailed p-value of 0.05. (EPS)

**Figure S5 Region size is uncorrelated with flexibility.** (A) Scatter plot of the size of the brain region in voxels (averaged over participants) versus the flexibility of the EXT multilayer networks, which we averaged over the 100 multilayer modularity optimizations and the 20 participants. Data points indicate brain regions. The line indicates the best linear fit. Its Pearson correlation coefficient is  $r = -0.009$ , and the associated p-value is  $p = 0.92$ . (B) Box plot over the 20 participants of the squared Pearson correlation coefficient  $r^2$  between the participant-specific region size in voxels and the participant-specific flexibility averaged over the 100 multilayer modularity optimizations. (EPS)

**Figure S6 Temporal core-periphery organization and task-related activations.** Mean GLM parameter estimates for the temporal core (cyan; circles), bulk (gold; squares), and periphery (maroon; diamonds) of dynamic networks defined by the trial blocks in which participants practiced sequences that would eventually be (A) extensively trained, (B) moderately trained, and (C) minimally trained for data from scanning sessions 1 (first day of training), 2 (after approximately 2 weeks of training), 3 (after approximately 4 weeks of training), and 4 (after approximately 6 weeks of training). (EPS)

**Figure S7 Effect of structural resolution parameter.** (A,B) Number of communities and (C,D) number of regions in the temporal core (cyan; circles), temporal bulk (gold; squares), and temporal periphery (maroon; diamonds) as a function of the structural resolution parameter  $\gamma$ , where we considered (A,C)  $\gamma \in [0.2, 5]$  in increments of  $\Delta\gamma = 0.2$  and (B,D)  $\gamma \in [0.8, 1.8]$  in increments of  $\Delta\gamma = 0.01$ . We averaged the values in panels (A) and (B) over 100 multilayer modularity optimizations and over the 20 participants. (EPS)

## References

1. Saalmann YB, Pinsk MA, Wang L, Li X, Kastner S (2012) The pulvinar regulates information transmission between cortical areas based on attention demands. *Science* 337: 753–756.
2. Josić K, Rubin J, Matias M, Romo R, editors (2009) *Coherent Behavior in Neuronal Networks*. Springer-Verlag.

**Figure S8 Effect of temporal resolution parameter.** (A) Number of communities averaged over 100 multilayer modularity optimizations and over 20 participants as a function of the temporal resolution parameter  $\omega$ . (B) Number of regions that we identified as part of the temporal core (cyan; circles), temporal bulk (gold; squares), and temporal periphery (maroon; diamonds) as we vary  $\omega$  from 0.1 to 2 in increments of  $\Delta\omega = 0.1$ . (EPS)

**Table S1 Experimental details for behavioral data acquired between scanning sessions.** We give the minimum, mean, maximum, and standard error of the mean over participants for the following variables: the number of days between scanning sessions; the number of practice sessions performed at home between scanning sessions; and the number of trials composed of extensively, moderately, and minimally trained sequences during home practice between scanning sessions. (PDF)

**Table S2 Experimental details for brain imaging data acquired during scanning sessions.** In the top three rows, we give the mean, minimum, maximum, and standard error over participants for the number of blocks composed of extensively, moderately, and minimally trained sequences during scanning sessions. In the bottom three rows, we give (in TRs) the mean, minimum, maximum, and standard error of the length over blocks composed of extensively, moderately, and minimally trained sequences during scanning sessions. (PDF)

**Table S3 Brain regions in the Harvard-Oxford (HO) cortical and subcortical parcellation scheme provided by FSL [83,84] and their affiliation to the temporal core (C; cyan), bulk (B; gold), and periphery (P; maroon) for both left (L) and right (R) hemispheres.** (PDF)

**Text S1 Supplementary materials for “Task-Based Core-Periphery Organization of Human Brain Dynamics”.** In this document, we provide additional results to demonstrate the reliability of temporal core-periphery organization, the reliability of geometrical core-periphery organization, and the relationship between temporal core-periphery organization and community structure. We also include a length section on important methodological considerations. (PDF)

## Acknowledgments

We thank Jean M. Carlson, Matthew Cieslak, John Doyle, Daniel Greenfield, and Megan T. Valentine for helpful discussions; John Bushnell for technical support; and James Fowler, Sang Hoon Lee, and Melissa Lever for comments on earlier versions of the manuscript.

## Author Contributions

Conceived and designed the experiments: NFW STG. Performed the experiments: NFW STG. Analyzed the data: DSB NFW MPR. Contributed reagents/materials/analysis tools: DSB NFW MPR MAP PJM STG. Wrote the paper: DSB NFW MPR MAP PJM STG.

5. Bullmore ET, Bassett DS (2011) Brain graphs: graphical models of the human brain connectome. *Ann Rev Clin Psych* 7: 113–140.
6. Langer N, Pedroni A, Gianotti LR, Hänggi J, Knoch D, et al. (2012) Functional brain network efficiency predicts intelligence. *Hum Brain Mapp* 33: 1393–1406.
7. Bassett DS, Bullmore ET (2009) Human brain networks in health and disease. *Curr Opin Neurol* 22: 340–347.
8. Matsuzaka Y, Picard N, Strick PL (2007) Skill representation in the primary motor cortex after long-term practice. *J Neurophysiol* 97: 1819–1832.
9. Wymbs NF, Grafton ST (2009) Neural substrates of practice structure that support future off-line learning. *J Neurophysiol* 102: 2462–2476.
10. Sun FT, Miller LM, Rao AA, D'Esposito M (2007) Functional connectivity of cortical networks involved in bimanual motor sequence learning. *Cereb Cortex* 17: 1227–1234.
11. Mushiake H, Saito N, Sakamoto K, Itoyama Y, Tanji J (2006) Activity in the lateral prefrontal cortex reflects multiple steps of future events in action plans. *Neuron* 50: 631–641.
12. Porter MA, Onnela JP, Mucha PJ (2009) Communities in networks. *Not Amer Math Soc* 56: 1082–1097, 1164–1166.
13. Fortunato S (2010) Community detection in graphs. *Phys Rep* 486: 75–174.
14. Mucha PJ, Richardson T, Macon K, Porter MA, Onnela JP (2010) Community structure in time-dependent, multiscale, and multiplex networks. *Science* 328: 876–878.
15. Bassett DS, Porter MA, Wymbs NF, Grafton ST, Carlson JM, et al. (2012) Robust detection of dynamic community structure in networks. *Chaos* 23: 013142.
16. Holme P, Saramäki J (2012) Temporal networks. *Phys Rep* 519: 97–125.
17. Bassett DS, Wymbs NF, Porter MA, Mucha PJ, Carlson JM, et al. (2011) Dynamic reconfiguration of human brain networks during learning. *Proc Natl Acad Sci USA* 108: 7641–7646.
18. Borgatti SP, Everett MG (1999) Models of core/periphery structures. *Social Networks* 21: 375–395.
19. Dodge Y (2003) *The Oxford Dictionary of Statistical Terms*. Oxford University Press.
20. Darlington RB (1970) Is kurtosis really 'peakedness'? *The American Statistician* 24: 19–22.
21. Mesulam MM (1998) From sensation to cognition. *Brain* 121: 1013–1052.
22. Bischoff-Grethe A, Goedert KM, Willingham DT, Grafton ST (2004) Neural substrates of response-based sequence learning using fMRI. *J Cogn Neurosci* 16: 127–138.
23. Picard N, Strick PL (1997) Activation on the medial wall during remembered sequences of reaching movements in monkeys. *J Neurophysiol* 77: 2197–2201.
24. Kennerley SW, Sakai K, Rushworth MF (2004) Organization of action sequences and the role of the pre-SMA. *J Neurophysiol* 91: 978–993.
25. Willingham DB, Salidis J, Gabrieli JD (2002) Direct comparison of neural systems mediating conscious and unconscious skill learning. *J Neurophysiol* 88: 1451–1460.
26. Destrebecqz A, Peigneux P, Laureys S, Degueldre C, Del Fiore G, et al. (2005) The neural correlates of implicit and explicit sequence learning: Interacting networks revealed by the process dissociation procedure. *Learn Mem* 12: 480–490.
27. Brown R, Robertson E (2007) Inducing motor skill improvements with a declarative task. *Nat Neurosci* 10: 148–149.
28. Guimerà R, Amaral LAN (2005) Functional cartography of complex metabolic networks. *Nature* 433: 895–900.
29. Guimerà R, Sales-Pardo M, Amaral LAN (2007) Classes of complex networks defined by role-torque connectivity profiles. *Nat Phys* 3: 63–69.
30. Rombach MP, Porter MA, Fowler JH, Mucha PJ (2012) Core-periphery structure in networks. *arXiv* : 1202.2684.
31. Opsahl T, Agneessens F, Skvoretz J (2010) Node centrality in weighted networks: Generalizing degree and shortest paths. *Social Networks* 32: 245–251.
32. Holme P (2005) Core-periphery organization of complex networks. *Phys Rev E* 72: 046111.
33. da Silva MR, Ma H, Zeng AP (2008) Centrality, network capacity, and modularity as parameters to analyze the core-periphery structure in metabolic networks. *Proceedings of the IEEE* 96: 1411–1420.
34. Hagmann P, Cammoun L, Gigandet X, Meuli R, Honey CJ, et al. (2008) Mapping the structural core of human cerebral cortex. *PLoS Biol* 6: e159.
35. Garas A, Schweitzer F, Havlin S (2012) A *k*-shell decomposition method for weighted networks. *New J Phys* 14.
36. Shanahan M, Wildie M (2012) Knotty-centrality: finding the connective core of a complex network. *PLoS One* 7: e36579.
37. Colizza V, Flammini A, Serrano MA, Vespignani A (2006) Detecting rich-club ordering in complex networks. *Nat Phys* 2: 110–116.
38. Opsahl T, Colizza V, Panzarasa P, Ramasco JJ (2008) Prominence and control: the weighted rich-club effect. *Phys Rev Lett* 101: 168702.
39. van den Heuvel MP, Sporns O (2011) Rich-club organization of the human connectome. *J Neurosci* 31: 15775–15786.
40. van den Heuvel MP, Kahn RS, Goñi J, Sporns O (2012) High-cost, high-capacity backbone for global brain communication. *Proc Natl Acad Sci USA* 109: 11372–11377.
41. Ekman M, Derrfuss J, Tittgemeyer M, Fiebach CJ (2012) Predicting errors from reconfiguration patterns in human brain networks. *Proc Natl Acad Sci U S A* 109: 16714–16719.
42. Sepulcre J, Sabuncu MR, Yeo TB, Liu H, Johnson KA (2012) Stepwise connectivity of the modal cortex reveals the multimodal organization of the human brain. *J Neurosci* 32: 10649–10661.
43. Fornito A, Harrison BJ, Zalesky A, Simons JS (2012) Competitive and cooperative dynamics of large-scale brain functional networks supporting recollection. *Proc Natl Acad Sci USA* 109: 12788–12793.
44. Dosenbach NU, Visscher KM, Palmer ED, Miezin FM, Wenger KK, et al. (2006) A core system for the implementation of task sets. *Neuron* 50: 799–812.
45. de Pasquale F, Della Penna S, Snyder AZ, Marzetti L, Pizzella V, et al. (2012) A cortical core for dynamic integration of functional networks in the resting human brain. *Neuron* 74: 753–764.
46. Uddin LQ, Supekar KS, Ryali S, Menon V (2011) Dynamic reconfiguration of structural and functional connectivity across core neurocognitive brain networks with development. *J Neurosci* 31: 18578–18589.
47. Whitlow CT, Casanova R, Maldjian JA (2011) Effect of resting-state functional mr imaging duration on stability of graph theory metrics of brain network connectivity. *Radiology* 259: 516–524.
48. Kramer MA, Eden UT, Lepage KQ, Kolaczuk ED, Bianchi MT, et al. (2011) Emergence of persistent networks in long-term intracranial eeg recordings. *J Neurosci* 31: 15757–15767.
49. Chu CJ, Kramer MA, Pathmanathan J, Bianchi MT, Westover MB, et al. (2012) Emergence of stable functional networks in long-term human electroencephalography. *J Neurosci* 32: 2703–2713.
50. Allen EA, Damaraju E, Plis SM, Erhardt EB, Eichele T, et al. (2012) Tracking whole-brain connectivity dynamics in the resting state. *Cereb Cortex* [Epub ahead of print] doi: 10.1093/cercor/bhs352
51. Jones DT, Vemuri P, Murphy MC, Gunter JL, Senjem ML, et al. (2012) Non-stationarity in the “resting brain’s” modular architecture. *PLoS One* 7: e39731.
52. Siebenhühner F, Weiss SA, Coppola R, Weinberger DR, Bassett DS (2012) Intra- and inter-frequency brain network structure in health and schizophrenia. *arXiv* 1209.0729.
53. Barnes A, Bullmore ET, Suckling J (2009) Endogenous human brain dynamics recover slowly following cognitive effort. *PLoS One* 4: e6626.
54. Tambini A, Ketz N, Davachi L (2010) Enhanced brain correlations during rest are related to memory for recent experiences. *Neuron* 65: 280–290.
55. Doron KW, Bassett DS, Gazzaniga MS (2012) Dynamic network structure of interhemispheric coordination. *Proc Natl Acad Sci U S A* 109: 18661–18668.
56. Sheppard JP, Wang JP, Wong PC (2012) Large-scale cortical network properties predict future sound-to-word learning success. *J Cogn Neurosci* 24: 1087–1103.
57. Zalesky A, Fornito A, Harding IH, Cocchi L, Yucel M, et al. (2010) Whole-brain anatomical networks: Does the choice of nodes matter? *NeuroImage* 50: 970–983.
58. Wang J, Wang L, Zang Y, Yang H, Tang H, et al. (2009) Parcellation-dependent small-world brain functional networks: A resting-state fMRI study. *Hum Brain Mapp* 30: 1511–1523.
59. Power JD, Cohen AL, Nelson SM, Wig GS, Barnes KA, et al. (2011) Functional network organization of the human brain. *Neuron* 72: 665–678.
60. Bassett DS, Brown JA, Deshpande V, Carlson JM, Grafton ST (2011) Conserved and variable architecture of human white matter connectivity. *NeuroImage* 54: 1262–1279.
61. Wig GS, Schlaggar BL, Petersen SE (2011) Concepts and principles in the analysis of brain networks. *Ann NY Acad Sci* 1224: 126–146.
62. de Reus MA, van den Heuvel MP (2013) The parcellation-based connectome: Limitations and extensions. *NeuroImage* Epub ahead of print.
63. Friston KJ (2011) Functional and effective connectivity: a review. *Brain Connect* 1: 13–36.
64. Horwitz B (2003) The elusive concept of brain connectivity. *NeuroImage* 19: 466–470.
65. Gavrilescu M, Stuart GW, Rossell S, Henshall K, McKay C, et al. (2008) Functional connectivity estimation in fMRI data: influence of preprocessing and time course selection. *Hum Brain Mapp* 29: 1040–1052.
66. Jones TB, Bandettini PA, Kenworthy L, Case LK, Milleville SC, et al. (2010) Sources of group differences in functional connectivity: an investigation applied to autism spectrum disorder. *NeuroImage* 49: 401–414.
67. David O, Cosmelli D, Friston KJ (2004) Evaluation of different measures of functional connectivity using a neural mass model. *NeuroImage* 21: 659–673.
68. Smith SM, Miller KL, Salimi-Khorshidi G, Webster M, Beckmann CF, et al. (2011) Network modelling methods for FMRI. *NeuroImage* 54: 875–91.
69. Ryali S, Chen T, Supekar K, Menon V (2012) Estimation of functional connectivity in fMRI data using stability selection-based sparse partial correlation with elastic net penalty. *NeuroImage* 59: 3852–3861.
70. Gates KM, Molenaar PC (2012) Group search algorithm recovers effective connectivity maps for individuals in homogeneous and heterogeneous samples. *NeuroImage* 63: 310–319.
71. Watanabe T, Hirose S, Wada H, Imai Y, Machida T, et al. (2013) A pairwise maximum entropy model accurately describes resting-state human brain networks. *Nat Comm* 4: 1370.
72. Schmidt RA, Lee TD (2005) *Motor Control and Learning: A Behavioral Emphasis*. Human Kinetics, fourth edition.
73. Rosenbaum DA (2010) *Human Motor Control*. Elsevier.

74. Yarrow K, Brown P, Krakauer JW (2009) Inside the brain of an elite athlete: the neural processes that support high achievement in sports. *Nat Rev Neurosci* 10: 585–596.
75. Dayan E, Cohen LG (2011) Neuroplasticity subserving motor skill learning. *Neuron* 72: 443–454.
76. Snoddy GS (1926) Learning and stability: A psychophysical analysis of a case of motor learning with clinical applications. *J App Psych* 10: 1–36.
77. Crossman ERFW (1959) A theory of the acquisition of speed-skill. *Ergonomics* 2: 153–166.
78. Newell KM, Rosenbloom PS (1981) Mechanisms of skill acquisition and the law of practice. In: Anderson JR, editor. *Cognitive skills and their acquisition*. Lawrence Erlbaum Associates. pp. 1–55.
79. Heathcote A, Brown S, Mewhort DJ (2000) The power law repealed: the case for an exponential law of practice. *Psychon Bull Rev* 7: 185–207.
80. Bassett DS, Bullmore ET (2006) Small-world brain networks. *Neuroscientist* 12: 512–523.
81. Bullmore E, Sporns O (2009) Complex brain networks: Graph theoretical analysis of structural and functional systems. *Nat Rev Neurosci* 10: 186–198.
82. Mantzaris AV, Bassett DS, Wymbs NF, Estrada E, Porter MA, et al. (2013) Dynamic network centrality summarizes learning in the human brain. *Journal of Complex Networks* [Epub Ahead of Print] doi: 10.1093/comnet/cnt001
83. Smith SM, Jenkinson M, Woolrich MW, Beckmann CF, Behrens TEJ, et al. (2004) Advances in functional and structural MR image analysis and implementation as FSL. *NeuroImage* 23: 208–219.
84. Woolrich MW, Jbabdi W, Patenaude B, Chappell M, Makni S, et al. (2009) Bayesian analysis of neuroimaging data in FSL. *NeuroImage* 45: S173–S186.
85. Bullmore E, Fadili J, Breakspear M, Salvador R, Suckling J, et al. (2003) Wavelets and statistical analysis of functional magnetic resonance images of the human brain. *Stat Methods Med Res* 12: 375–399.
86. Bullmore E, Fadili J, Maxim V, Sendur L, Whitcher B, et al. (2004) Wavelets and functional magnetic resonance imaging of the human brain. *NeuroImage* 23: S234–S249.
87. Brammer MJ (1998) Multidimensional wavelet analysis of functional magnetic resonance images. *Hum Brain Mapp* 6: 378–382.
88. Achard S, Salvador R, Whitcher B, Suckling J, Bullmore E (2006) A resilient, low-frequency, small-world human brain functional network with highly connected association cortical hubs. *J Neurosci* 26: 63–72.
89. Bassett DS, Meyer-Lindenberg A, Achard S, Duke T, Bullmore E (2006) Adaptive reconfiguration of fractal small-world human brain functional networks. *Proc Natl Acad Sci USA* 103: 19518–19523.
90. Achard S, Bullmore E (2007) Efficiency and cost of economical brain functional networks. *PLoS Comp Biol* 3: e17.
91. Achard S, Bassett DS, Meyer-Lindenberg A, Bullmore E (2008) Fractal connectivity of longmemory networks. *Phys Rev E* 77: 036104.
92. Bassett DS, Meyer-Lindenberg A, Weinberger DR, Coppola R, Bullmore E (2009) Cognitive fitness of cost-efficient brain functional networks. *Proc Natl Acad Sci USA* 106: 11747–11752.
93. Lynall ME, Bassett DS, Kerwin R, McKenna P, Muller U, et al. (2010) Functional connectivity and brain networks in schizophrenia. *J Neurosci* 30: 9477–9487.
94. Percival DB, Walden AT (2000) *Wavelet Methods for Time Series Analysis*. Cambridge University Press.
95. Sun FT, Miller LM, D'Esposito M (2004) Measuring interregional functional connectivity using coherence and partial coherence analyses of fMRI data. *NeuroImage* 21: 647–658.
96. Newman MEJ, Girvan M (2004) Finding and evaluating community structure in networks. *Phys Rev E* 69: 026113.
97. Newman MEJ (2006) Modularity and community structure in networks. *Proc Natl Acad Sci USA* 103: 8577–8582.
98. Newman MEJ (2006) Finding community structure in networks using the eigenvectors of matrices. *Phys Rev E* 74: 036104.
99. Jutla IS, Jeub LGS, Mucha PJ (2011–2012). A generalized Louvain method for community detection implemented in MATLAB. URL <http://netwiki.amath.unc.edu/GenLouvain>.
100. Blondel VD, Guillaume JL, Lambiotte R, Lefebvre E (2008) Fast unfolding of community hierarchies in large networks. *J Stat Mech* : P10008.
101. Matsumoto M, Nishimura T (1998) Mersenne twister: a 623-dimensionally equidistributed uniform pseudo-random number generator. *ACM Transactions on Modeling and Computer Simulation* 8: 3–30.
