# Supplementary material for: Task-Based Core-Periphery Organization of Human Brain Dynamics
Source: PLOS journal article supplement (doi:10.1371/journal.pcbi.1003171), 2013-09-26
Supplement: S9 (10.1371/journal.pcbi.1003171.s009) [file journal.pcbi.1003171.s009]

|                            | Mean   | Minimum | Maximum | Standard Error |
|----------------------------|--------|---------|---------|----------------|
| Days                       |        |         |         |                |
| Between Scans 1 and 2      | 12.00  | 9       | 14      | 0.34           |
| Between Scans 2 and 3      | 12.45  | 10      | 14      | 0.29           |
| Between Scans 3 and 4      | 12.10  | 9       | 22      | 0.63           |
| Practice Sessions          |        |         |         |                |
| Between Scans 1 and 2      | 9.70   | 8       | 10      | 0.14           |
| Between Scans 2 and 3      | 9.75   | 4       | 14      | 0.44           |
| Between Scans 3 and 4      | 10.05  | 7       | 13      | 0.32           |
| Extensively Trained Trials |        |         |         |                |
| Between Scans 1 and 2      | 620.80 | 512     | 640     | 9.40           |
| Between Scans 2 and 3      | 624.00 | 256     | 896     | 28.57          |
| Between Scans 3 and 4      | 643.20 | 448     | 832     | 20.48          |
| Moderately Trained Trials  |        |         |         |                |
| Between Scans 1 and 2      | 97.00  | 80      | 100     | 1.46           |
| Between Scans 2 and 3      | 97.50  | 40      | 140     | 4.46           |
| Between Scans 3 and 4      | 100.50 | 70      | 130     | 3.20           |
| Minimally Trained Trials   |        |         |         |                |
| Between Scans 1 and 2      | 9.70   | 8       | 10      | 0.14           |
| Between Scans 2 and 3      | 9.75   | 4       | 14      | 0.44           |
| Between Scans 3 and 4      | 10.05  | 7       | 13      | 0.32           |

Table 1: **Experimental Details for Behavioral Data Acquired Between Scanning Sessions.** We give the minimum, mean, maximum, and standard error of the mean over participants for the following variables: the number of days between scanning sessions; the number of practice sessions performed at home between scanning sessions; and the number of trials composed of extensively, moderately, and minimally trained sequences during home practice between scanning sessions.
