# Supplementary material for: Task-Based Core-Periphery Organization of Human Brain Dynamics
Source: PLOS journal article supplement (doi:10.1371/journal.pcbi.1003171), 2013-09-26
Supplement: S10 (10.1371/journal.pcbi.1003171.s010) [file journal.pcbi.1003171.s010]

|                                      | Minimum | Mean  | Maximum | Standard Error |
|--------------------------------------|---------|-------|---------|----------------|
| Extensively Trained Blocks           |         |       |         |                |
| During Scan 1                        | 6.00    | 9.70  | 10.00   | 0.21           |
| During Scan 2                        | 10.00   | 10.00 | 10.00   | 0.00           |
| During Scan 3                        | 10.00   | 10.00 | 10.00   | 0.00           |
| During Scan 4                        | 8.00    | 9.90  | 10.00   | 0.10           |
| Moderately Trained Blocks            |         |       |         |                |
| During Scan 1                        | 5.00    | 9.70  | 11.00   | 0.27           |
| During Scan 2                        | 10.00   | 10.00 | 10.00   | 0.00           |
| During Scan 3                        | 10.00   | 10.00 | 10.00   | 0.00           |
| During Scan 4                        | 8.00    | 9.90  | 10.00   | 0.10           |
| Minimally Trained Blocks             |         |       |         |                |
| During Scan 1                        | 7.00    | 9.80  | 11.00   | 0.18           |
| During Scan 2                        | 10.00   | 10.00 | 10.00   | 0.00           |
| During Scan 3                        | 10.00   | 10.00 | 10.00   | 0.00           |
| During Scan 4                        | 8.00    | 9.90  | 10.00   | 0.10           |
| Length of Extensively Trained Blocks |         |       |         |                |
| During Scan 1                        | 52.50   | 61.94 | 72.20   | 1.34           |
| During Scan 2                        | 35.50   | 42.36 | 45.90   | 0.72           |
| During Scan 3                        | 35.40   | 40.79 | 45.50   | 0.77           |
| During Scan 4                        | 34.60   | 40.30 | 45.70   | 0.87           |
| Length of Moderately Trained Blocks  |         |       |         |                |
| During Scan 1                        | 50.80   | 61.67 | 72.60   | 1.26           |
| During Scan 2                        | 39.70   | 47.56 | 57.20   | 0.80           |
| During Scan 3                        | 37.60   | 45.07 | 52.80   | 0.67           |
| During Scan 4                        | 37.60   | 43.83 | 50.60   | 0.79           |
| Length of Minimally Trained Blocks   |         |       |         |                |
| During Scan 1                        | 52.10   | 61.19 | 70.60   | 1.29           |
| During Scan 2                        | 44.10   | 50.02 | 57.70   | 0.73           |
| During Scan 3                        | 42.50   | 47.37 | 54.50   | 0.71           |
| During Scan 4                        | 39.70   | 45.79 | 54.10   | 0.70           |

Table 1: **Experimental Details for Brain Imaging Data Acquired During Scanning Sessions.** In the top three rows, we give the mean, minimum, maximum, and standard error over participants for the number of blocks composed of extensively, moderately, and minimally trained sequences during scanning sessions. In the bottom three rows, we give (in TRs) the mean, minimum, maximum, and standard error of the length over blocks composed of extensively, moderately, and minimally trained sequences during scanning sessions.
